# Supplementary material for: Anion-driven mesogenicity: ionic liquid crystals based on the [closo-1-CB9H10]− cluster
Source: Royal Society of Chemistry journal article supplement (doi:10.1039/b905457j), 2009-01-01
Supplement: b905457j.pdf [file b905457j.pdf]

Electronic Supplementary Information for

**Anion-Driven Mesogenicity: Ionic Liquid Crystals based**

**on the [*closo*-1-CB<sub>9</sub>H<sub>10</sub>]<sup>-</sup> Cluster**

Bryan Ringstrand,<sup>a</sup> Hirosato Monobe,<sup>b</sup> and Piotr Kaszynski<sup>\*a</sup>

<sup>a</sup> *Organic Materials Research Group*, Department of Chemistry, Vanderbilt University, Nashville,  
TN 37235, USA.

<sup>b</sup> *Nanotechnology Research Institute*, National Institute of Advanced Industrial Science and  
Technology, AIST Kansai Centre, Midorigaoka 1-8-31, Ikeda, Osaka, 536-8577, Japan.

**Table of Content:**

|                                                  |         |
|--------------------------------------------------|---------|
| 1. Powder XRD data                               | ....S2  |
| 2. Optical textures for selected compounds       | ....S5  |
| 3. Synthetic details                             | ....S6  |
| 4. Computational Details                         | ....S22 |
| 5. Archive for HF/6-31G(d) computational results | ....S23 |
| 6. References                                    | ....S27 |

## 1. Powder XRD Data

**Table S1.** X-ray Diffraction Data.

| Sample         | temp<br>/°C | phase             | 2θ<br>/°  | d (exp)<br>/Å | d (calcd) | hkl      |                                                            |
|----------------|-------------|-------------------|-----------|---------------|-----------|----------|------------------------------------------------------------|
| <b>1d[Pyr]</b> | 180         | SmA               | 3.22      | 27.4          | 26.6      | 001      | $c = 26.6 \text{ Å}$                                       |
|                |             |                   | 6.64      | 13.3          | 13.3      | 002      |                                                            |
|                |             |                   | 10.16     | 8.7           | 8.8       | 003      |                                                            |
|                |             |                   | 16.5      | 5.5           | halo      |          |                                                            |
|                |             |                   | 19.8      | 4.5           | halo      |          |                                                            |
|                | 140         | X                 | 3.09      | 28.6          | 27.6      | 001      | $c = 27.6 \text{ Å}$                                       |
|                |             |                   | 6.40      | 13.8          | 13.8      | 002      |                                                            |
|                |             |                   | 7.74      | 11.4          |           |          |                                                            |
|                |             |                   | 9.74      | 9.1           | 9.2       | 003      |                                                            |
|                |             |                   | 10.78     | 8.2           |           |          |                                                            |
|                |             |                   | 12.10     | 7.3           |           |          |                                                            |
|                |             |                   | 13.07     | 6.8           | 6.9       | 004      |                                                            |
|                |             |                   | 14.31     | 6.2           |           |          |                                                            |
|                |             |                   | 16.43     | 5.4           | 5.5       | 005      |                                                            |
|                |             |                   | 17.44     | 5.1           |           |          |                                                            |
|                |             |                   | 18.03     | 4.92          |           |          |                                                            |
|                |             |                   | 19.53     | 4.54          |           |          |                                                            |
|                |             |                   | 19.81     | 4.48          |           |          |                                                            |
|                | 140         | SmA               | 3.29      | 26.8          | 26.0      | 001      | $c = 26.0 \text{ Å}$                                       |
|                |             |                   | 6.78      | 13.0          | 13.0      | 002      |                                                            |
|                |             |                   | 10.29     | 8.6           | 8.7       | 003      |                                                            |
|                |             |                   | 13.82     | 6.4           | 6.5       | 004      |                                                            |
|                |             |                   | 16.0      | 5.5           |           | halo     |                                                            |
|                |             |                   | 19.9      | 4.5           |           | halo     |                                                            |
|                |             |                   |           |               |           |          |                                                            |
| <b>1f[Pyr]</b> | 175         | SmA               | 3.32      | 26.6          | 25.8      | 001      | $c = 25.8 \text{ Å}$                                       |
|                |             |                   | 6.85      | 12.9          | 12.9      | 002      |                                                            |
|                |             |                   | 10.42     | 8.5           | 8.6       | 003      |                                                            |
|                |             |                   | 16.3-17.1 | 5.4-5.2       |           | halo     |                                                            |
|                |             |                   |           |               |           |          |                                                            |
|                | 155         | X <sub>orth</sub> | 3.38      | 26.1          | 25.7      | 001      | $a = 9.0 \text{ Å}, b = 5.2 \text{ Å}, c = 25.7 \text{ Å}$ |
|                |             |                   | 6.87      | 12.9          | 12.9      | 002      |                                                            |
|                |             |                   | 9.83      | 9.0           | 9.0       | 100      |                                                            |
|                |             |                   | 10.39     | 8.5           | 8.6       | 003, 101 |                                                            |
|                |             |                   | 13.94     | 6.4           | 6.4       | 004      |                                                            |

|     |    |       |      |      |          |                        |
|-----|----|-------|------|------|----------|------------------------|
|     |    | 16.98 | 5.2  | 5.2  | 010      |                        |
|     |    | 17.23 | 5.1  | 5.1  | 005, 011 |                        |
|     |    | 19.70 | 4.50 | 4.5  | 110      |                        |
|     |    | 20.00 | 4.44 | 4.4  | 111      |                        |
| 130 | X' | 3.36  | 26.3 | 25.6 | 001      | $c = 25.6 \text{ \AA}$ |
|     |    | 6.83  | 12.9 | 12.8 | 002      |                        |
|     |    | 7.75  | 11.4 |      |          |                        |
|     |    | 9.77  | 9.1  |      | 100      |                        |
|     |    | 10.31 | 8.6  | 8.6  | 003      |                        |
|     |    | 10.93 | 8.1  |      |          |                        |
|     |    | 12.10 | 7.3  |      |          |                        |
|     |    | 13.80 | 6.4  | 6.4  | 004      |                        |
|     |    | 14.17 | 6.2  |      |          |                        |
|     |    | 14.80 | 6.0  |      |          |                        |
|     |    | 17.35 | 5.1  | 5.2  | 010, 005 |                        |
|     |    | 18.02 | 4.9  |      |          |                        |
|     |    | 19.57 | 4.53 |      |          |                        |
|     |    | 19.89 | 4.46 |      |          |                        |

$c$  is calculated from  $d_{002}$ .

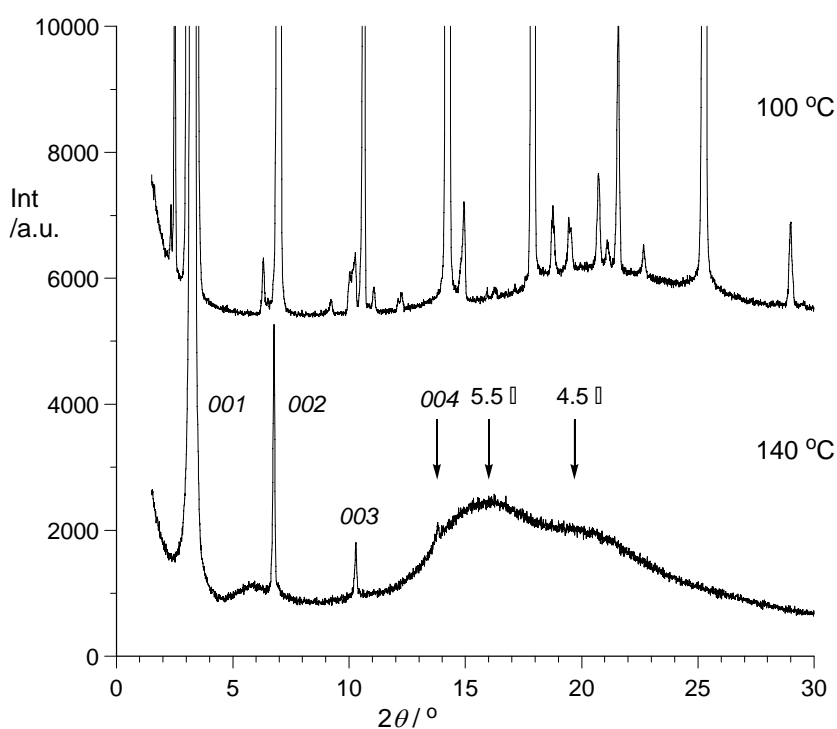

Figure S1. Stacked X-ray diffraction patterns for **2d[Pyr]** at 140 °C (SmA) and at 100 °C (crystal phase).

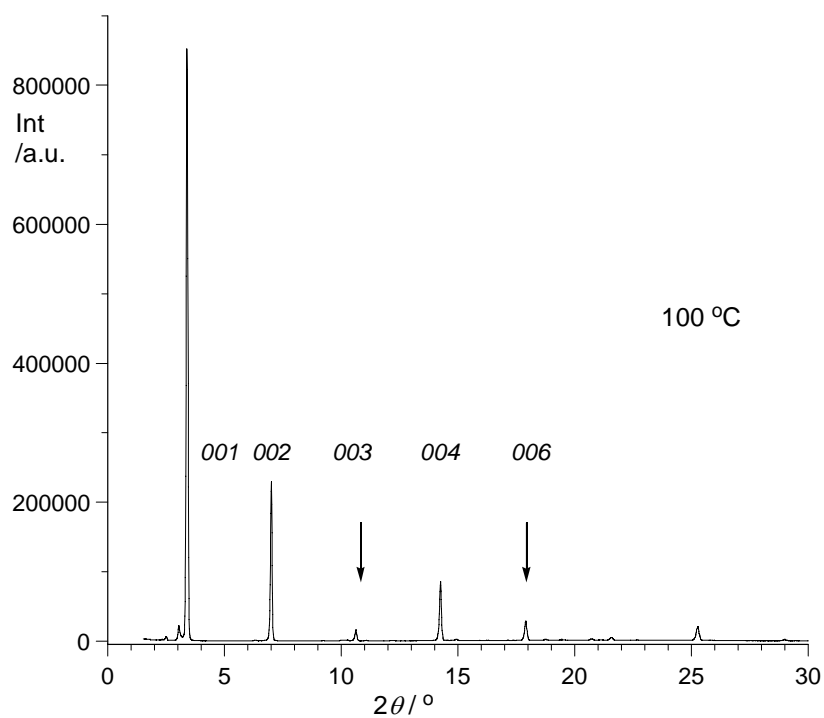

Figure S2. Full scale X-ray diffraction pattern for **2d[Pyr]** at 100 °C (crystal phase).

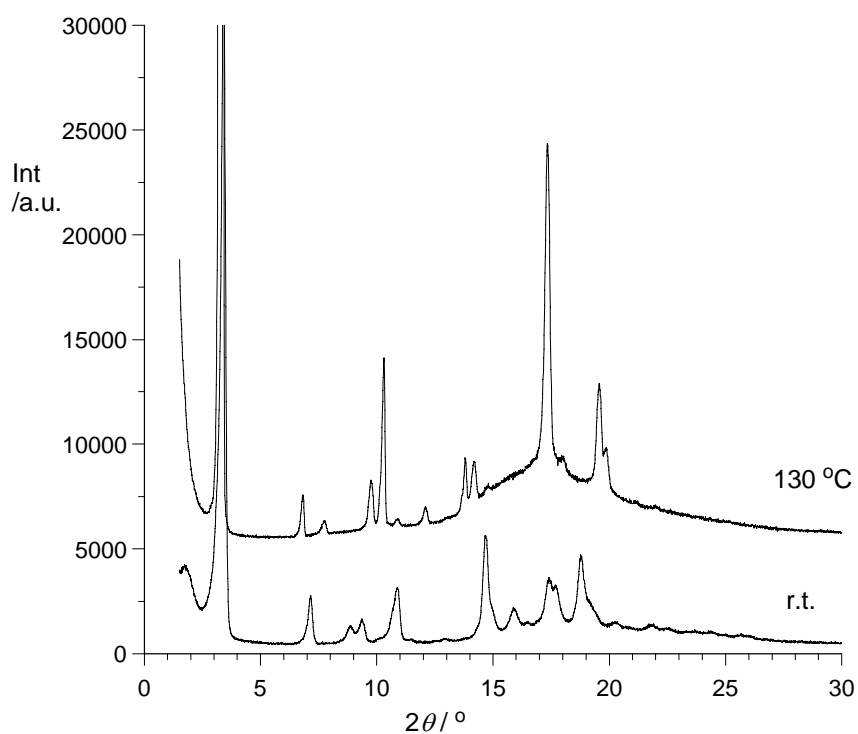

Figure S3. Stacked X-ray diffraction patterns for **1f[Pyr]** at ambient temperature before heating (crystalline phase) and at 130 °C (phase X).

## 2. Optical textures for selected compounds

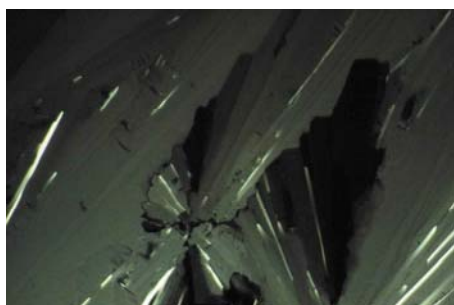

Figure S4. Optical textures of an unidentified phase X of **1b[Pyr]** obtained at 106 °C. Magnification  $\times 40$ .

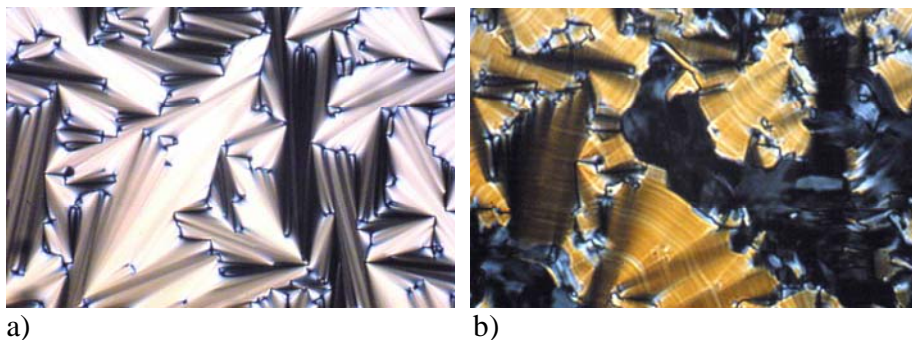

Figure S5. Optical textures of **1c[Pyr]** obtained for the same region of the sample upon cooling at (a) SmA at 164 °C (b) unidentified phase X at 91 °C. Magnification  $\times 50$ .

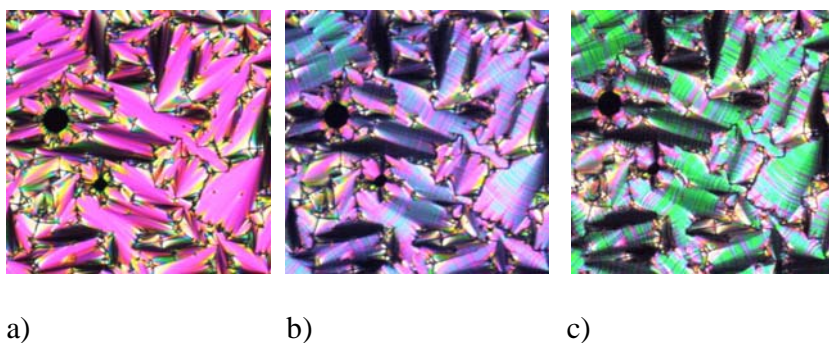

Figure S6. Optical textures of **1e[Pyr]** obtained for the same region of the sample upon cooling at (a) SmA at 157 °C (b) Phase E at 145 °C (c) Phase X at 120 °C. Magnification  $\times 40$ .

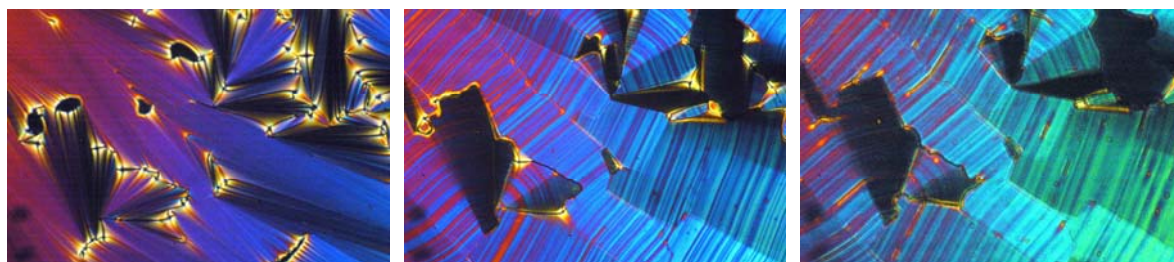

a) b) c)  
Figure S7. Optical textures of **1f[Pyr]** obtained for the same region of the sample upon cooling at (a) SmA at 180 °C (b) Phase E growing from SmA at 167 °C (c) Phase E at 151 °C. Magnification  $\times 50$ .

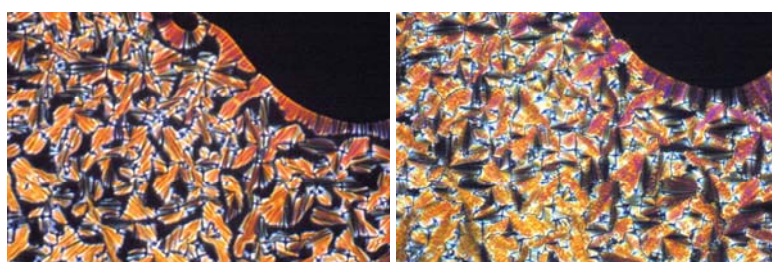

a) b)  
Figure S8. Optical textures of **2a[Pyr]** obtained for the same region of the sample upon cooling at (a) SmA at 110 °C (b) Phase X at 88 °C. Magnification  $\times 40$ .

### 3. Synthetic Details

$^1\text{H}$  NMR spectra were obtained at 400 MHz field for all compounds, excluding **7**, **1d[NMe<sub>4</sub>]**, **1e[Pyr]**, and **2c[Pyr]** which were recorded at 300 MHz field, in acetone-*d*<sub>6</sub> ( $\delta$  2.04 ppm), CD<sub>3</sub>CN ( $\delta$  1.93 ppm) or CDCl<sub>3</sub> ( $\delta$  7.26 ppm).  $^{11}\text{B}$  NMR were recorded at 128 MHz field. Chemical shifts were referenced to the solvent ( $^1\text{H}$ ) or to an external sample of B(OH)<sub>3</sub> in MeOH ( $^{11}\text{B}$ ,  $\delta$  = 18.1 ppm). IR spectra were recorded for microcrystalline samples using the ATR technique. Elemental analysis was provided by Atlantic Microlabs.

#### General Procedure for Preparation of **1[Pyr]** and **2[Pyr]**.

*N*-Butyl-4-heptyloxypyridinium bromide (**7**, 1.0 equivalent) was added to a solution of ester **1[NMe<sub>4</sub>]** or diazene **2[NMe<sub>4</sub>]** or **2[NHEt<sub>3</sub>]** in CH<sub>2</sub>Cl<sub>2</sub> and a precipitate formed. Water was added, and the biphasic system was stirred vigorously until all the precipitate had dissolved. The

CH<sub>2</sub>Cl<sub>2</sub> layer was separated, and the aqueous layer was extracted with additional CH<sub>2</sub>Cl<sub>2</sub>. The CH<sub>2</sub>Cl<sub>2</sub> layers were combined, dried (Na<sub>2</sub>SO<sub>4</sub>), and evaporated giving a white (**1[Pyrr]**) or yellow (**2[Pyrr]**) crystalline solid, which was recrystallized repeatedly from aqueous alcohol. The resulting crystals were dried in vacuum at ambient temperature.

**1a[Pyrr]:** Recrystallized from EtOH/H<sub>2</sub>O mixtures (3x) providing 0.017 g (61% yield for cation exchange) of the pure salt as a white powder: <sup>1</sup>H NMR (CDCl<sub>3</sub>) δ 0.40-2.50 (m, 8H, B-H), 0.86-0.96 (m, 12H), 1.23-1.50 (m, 26H), 1.53-1.60 (m, 2H), 1.75-1.87 (m, 6H), 1.87-1.95 (m, 2H), 1.97-2.04 (m, 2H) 3.96 (t, *J* = 6.5 Hz, 2H), 4.20 (t, *J* = 6.5 Hz, 2H), 4.26 (t, *J* = 7.5 Hz, 2H), 6.92 (d, *J* = 8.9 Hz, 2H), 7.18 (d, *J* = 8.9 Hz, 2H), 7.25 (d, *J* = 7.2 Hz, 2H), 8.30 (d, *J* = 7.2 Hz, 2H); <sup>11</sup>B NMR (acetone-*d*<sub>6</sub>) δ -24.0 (d, *J* = 139 Hz, 4B), -16.1 (d, *J* = 150 Hz, 4B), 48.2 (s, 1B). Anal. Calcd. for C<sub>39</sub>H<sub>72</sub>B<sub>9</sub>NO<sub>4</sub>: C, 64.14; H, 9.66; N, 1.92. Found: C, 64.37; H, 9.78; N, 1.97.

**1b[Pyrr]:** Recrystallized from cold EtOH (3x) providing 0.027 g (24% overall yield based on acid **3[NMe<sub>4</sub>]**) of the pure salt as a white powder: <sup>1</sup>H NMR (acetone-*d*<sub>6</sub>) δ 0.40-2.50 (m, 8H, B-H), 0.83-0.93 (m, 9H), 0.94 (t, *J* = 7.3 Hz, 3H), 1.25-1.50 (m, 24H), 1.56 (quintet, *J* = 7.0 Hz, 2H), 1.73 (quintet, *J* = 7.4 Hz, 2H), 1.83-1.98 (m, 6H), 2.02-2.08 (m, 2H), 2.59 (t, *J* = 7.4 Hz, 2H), 4.45 (t, *J* = 6.5 Hz, 2H), 4.61 (t, *J* = 7.4 Hz, 2H), 7.20 (d, *J* = 8.9 Hz, 2H), 7.31 (d, *J* = 8.9 Hz, 2H), 7.65 (d, *J* = 7.3 Hz, 2H), 8.89 (d, *J* = 7.4 Hz, 2H); <sup>11</sup>B NMR (acetone-*d*<sub>6</sub>) δ -23.9 (d, *J* = 136 Hz, 4B), -16.0 (d, *J* = 148 Hz, 4B), 48.0 (s, 1B). Anal. Calcd. for C<sub>39</sub>H<sub>70</sub>B<sub>9</sub>NO<sub>5</sub>: C, 65.39; H, 10.13; N, 1.96. Found: C, 65.19; H, 10.20; N, 2.00.

**1c[Pyrr]:** Recrystallized from EtOH/H<sub>2</sub>O mixtures (3x) providing 0.020 g (17% overall yield based on acid **3[NMe<sub>4</sub>]**) of the pure salt as a white powder: <sup>1</sup>H NMR (acetone-*d*<sub>6</sub>) δ 0.40-2.50 (m, 8H, B-H), 0.84-0.92 (m, 9H), 0.95 (t, *J* = 7.3 Hz, 3H), 0.98-1.10 (m, 2H), 1.20-1.44 (m, 21H), 1.45-1.60 (m, 6H), 1.83-1.97 (m, 8H), 2.01-2.08 (m, 2H), 2.10-2.20 (m, 2H), 2.52 (tt, *J*<sub>1</sub> = 12.2 Hz, *J*<sub>2</sub> = 3.5 Hz, 1H), 4.46 (t, *J* = 6.5 Hz, 2H), 4.63 (t, *J* = 7.4 Hz, 2H), 7.18 (d, *J* = 8.9 Hz, 2H), 7.31 (d, *J* = 8.9 Hz, 2H), 7.66 (d, *J* = 7.5 Hz, 2H), 8.90 (d, *J* = 7.5 Hz, 2H); <sup>11</sup>B NMR (acetone-*d*<sub>6</sub>) δ -23.9 (d, *J* = 142 Hz, 4B), -16.0 (d, *J* = 147 Hz, 4B), 48.0 (s, 1B). Anal. Calcd. for C<sub>42</sub>H<sub>74</sub>B<sub>9</sub>NO<sub>5</sub>: C, 65.48; H, 9.68; N, 1.82. Found: C, 65.47; H, 9.70; N, 1.84.

**1d[Pyrr]:** Recrystallized from EtOH/H<sub>2</sub>O mixtures (3x) providing 0.041 g (20% overall yield based on acid **3[NMe<sub>4</sub>]**) of the pure salt as white crystals: <sup>1</sup>H NMR (acetone-*d*<sub>6</sub>) δ 0.40-3.50 (m, 18H, B-H), 0.83 (t, *J* = 7.2 Hz, 3H), 0.87 (t, *J* = 7.3 Hz, 3H), 0.91 (t, *J* = 7.6 Hz, 3H), 0.95 (t, *J* = 7.4 Hz, 3H), 1.10-1.43 (m, 18H), 1.45-1.52 (m, 2H), 1.53-1.60 (m, 2H), 1.67-1.75 (m, 2H), 1.83-1.97 (m, 6H), 1.98-2.07 (m, 2H), 4.47 (t, *J* = 6.5 Hz, 2H), 4.64 (t, *J* = 7.5 Hz, 2H), 7.15 (d, *J* = 9.0 Hz, 2H), 7.33 (d, *J* = 9.0 Hz, 2H), 7.68 (d, *J* = 7.0 Hz, 2H), 8.92 (d, *J* = 6.7 Hz, 2H); <sup>11</sup>B NMR (acetone-*d*<sub>6</sub>) δ -23.9 (d, *J* = 132 Hz, 4B), -15.9 (d, *J* = 151 Hz, 4B), -13.2 (d, *J* = 161 Hz, 5B), -12.6 (d, *J* = 154 Hz, 5B), 48.3 (s, 1B). Anal. Calcd. for C<sub>38</sub>H<sub>74</sub>B<sub>19</sub>NO<sub>5</sub>: C, 54.96; H, 8.98; N, 1.69. Found: C, 55.17; H, 8.99; N, 1.63.

**1e[Pyrr]:** Recrystallized from EtOH/H<sub>2</sub>O mixtures (3x) giving 10 mg (20% overall yield based on acid **3[NMe<sub>4</sub>]**) of the pure salt as white crystals: <sup>1</sup>H NMR (300 MHz, acetone-*d*<sub>6</sub>) δ 0.40-2.50 (m, 8H, B-H), 0.84-0.94 (m, 9H), 0.95 (t, *J* = 7.4 Hz, 3H), 1.01-1.20 (m, 2H), 1.21-1.61 (m, 31H), 1.78-2.10 (m, 8H), 2.53 (bt, *J* = 12.2 Hz, 1H), 4.46 (d, *J* = 6.5 Hz, 2H), 4.64 (t, *J* = 7.4

Hz, 2H), 7.17 (d,  $J = 8.6$  Hz, 2H), 7.30 (d,  $J = 8.5$  Hz, 2H), 7.68 (d,  $J = 7.5$  Hz, 2H), 8.92 (d,  $J = 7.5$  Hz, 2H);  $^{11}\text{B}$  NMR (acetone- $d_6$ )  $\delta$  -23.9 (d,  $J = 131$  Hz, 4B), -16.1 (d,  $J = 155$  Hz, 4B), 48.0 (s, 1B); UV (MeCN),  $\lambda_{\text{max}}$  243 nm, ( $\log \epsilon = 4.32$ ), ( $\text{CH}_2\text{ClCH}_2\text{Cl}$ ),  $\lambda_{\text{max}}$  248 nm, ( $\log \epsilon = 4.30$ ).  
Anal. Calcd. for  $\text{C}_{41}\text{H}_{74}\text{B}_9\text{NO}_3$ : C, 67.80; H, 10.27; N, 1.93. Found: C, 68.04; H, 10.33; N, 1.92.

**1f[Pyr]**: Recrystallized from EtOH/H<sub>2</sub>O mixtures (3x) providing 0.030 g (19% overall yield based on acid **3[NMe<sub>4</sub>]**) of the pure salt as white crystals:  $^1\text{H}$  NMR (acetone- $d_6$ )  $\delta$  0.40-3.50 (m, 18H, B-H), 0.84 (t,  $J = 7.2$  Hz, 3H), 0.86 (t,  $J = 7.0$  Hz, 3H), 0.91 (t,  $J = 7.1$  Hz, 3H), 0.95 (t,  $J = 7.4$  Hz, 3H), 1.10-1.60 (m, 22H), 1.68-1.76 (m, 2H), 1.82-1.95 (m, 6H), 1.98-2.09 (m, 2H), 4.46 (t,  $J = 6.5$  Hz, 2H), 4.64 (d,  $J = 7.4$  Hz, 2H), 7.17 (d,  $J = 8.8$  Hz, 2H), 7.34 (d,  $J = 8.8$  Hz, 2H), 7.67 (d,  $J = 6.2$  Hz, 2H), 8.92 (d,  $J = 5.9$  Hz, 2H);  $^{11}\text{B}$  NMR (acetone- $d_6$ )  $\delta$  -23.8 (d,  $J = 148$  Hz, 4B), -15.9 (d,  $J = 153$  Hz, 4B), -12.3 (d,  $J = 157$  Hz, 10B) 47.9 (s, 1B). Anal. Calcd. for  $\text{C}_{37}\text{H}_{74}\text{B}_{19}\text{NO}_3$ : C, 56.51; H, 9.48; N, 1.78. Found: C, 56.55; H, 9.51; N, 1.75.

**2a[Pyr]** as a yellow crystalline solid, which was recrystallized from MeOH (3x) followed by EtOH (3x) giving 0.024 g (32% overall yield based on phenol **5[NMe<sub>4</sub>]**) of pure **2a[Pyr]** as yellow leaflets:  $^1\text{H}$  NMR (acetone- $d_6$ )  $\delta$  0.40-2.50 (m, 8H, B-H), 0.84-0.89 (m, 6H), 0.90 (t,  $J = 7.1$  Hz, 3H), 0.95 (t,  $J = 7.3$  Hz, 3H), 1.20-1.62 (m, 28H), 1.77-2.08 (m, 10H), 4.10 (t,  $J = 6.5$  Hz, 2H), 4.46 (t,  $J = 6.5$  Hz, 2H), 4.63 (t,  $J = 7.5$  Hz, 2H), 7.07 (d,  $J = 8.9$  Hz, 2H), 7.67 (d,  $J = 7.4$  Hz, 2H), 7.84 (d,  $J = 8.8$  Hz, 2H), 8.90 (d,  $J = 7.4$  Hz, 2H);  $^{11}\text{B}$  NMR (acetone- $d_6$ )  $\delta$  -24.5 (d,  $J = 140$  Hz, 4B), -17.1 (d,  $J = 157$  Hz, 4B), 42.5 (s, 1B). Anal. Calcd. for  $\text{C}_{38}\text{H}_{72}\text{B}_9\text{N}_3\text{O}_2$ : C, 65.17; H, 10.36; N, 6.00. Found: C, 65.45; H, 10.62; N, 6.03.

**2b[Pyr]**: Recrystallized from MeOH (3x) followed by EtOH (2x) giving 0.052 g (72% overall yield based on phenol **5[NMe<sub>4</sub>]**) of the pure salt as yellow leaflets: <sup>1</sup>H NMR (acetone-*d*<sub>6</sub>) δ 0.40-2.50 (m, 8H, B-H), 0.83-0.91 (m, 6H), 0.92 (t, *J* = 7.1 Hz, 3H), 0.94 (t, *J* = 7.4 Hz, 3H), 1.25-1.51 (m, 24H), 1.58 (quintet, *J* = 7.1 Hz, 2H), 1.75 (quintet, *J* = 7.4 Hz, 2H), 1.84-1.94 (m, 6H), 1.96-2.08 (m, 2H), 2.63 (t, *J* = 7.4 Hz, 2H), 4.45 (t, *J* = 6.5 Hz, 2H), 4.62 (t, *J* = 7.4 Hz, 2H), 7.30 (d, *J* = 8.7 Hz, 2H), 7.66 (d, *J* = 7.4 Hz, 2H), 7.91 (d, *J* = 8.8 Hz, 2H), 8.90 (d, *J* = 7.4 Hz, 2H); <sup>11</sup>B NMR (acetone-*d*<sub>6</sub>) δ -24.4 (d, *J* = 136 Hz, 4B), -16.9 (d, *J* = 149 Hz, 4B), 44.0 (s, 1B). Anal. Calcd. for C<sub>38</sub>H<sub>70</sub>B<sub>9</sub>N<sub>3</sub>O<sub>3</sub>: C, 63.90; H, 9.88; N, 5.88. Found: C, 64.12; H, 10.03; N, 5.94.

**2c[Pyr]**: Recrystallized from MeOH (3x) followed by EtOH (2x) giving 0.043 g (38% overall yield based on phenol **5[NMe<sub>4</sub>]**) of the pure diazene as yellow leaflets: <sup>1</sup>H NMR (300 MHz, acetone-*d*<sub>6</sub>) δ 0.40-2.50 (m, 8H, B-H), 0.83-0.93 (m, 9H), 0.94 (t, *J* = 7.4 Hz, 3H), 0.98-1.13 (m, 2H), 1.20-1.64 (m, 27H), 1.80-2.01 (m, 10H), 2.10-2.22 (m, 2H), 2.55 (tt, *J*<sub>1</sub> = 12.2 Hz, *J*<sub>2</sub> = 3.6 Hz, 1H), 4.45 (t, *J* = 6.5 Hz, 2H), 4.62 (t, *J* = 7.4 Hz, 2H), 7.28 (d, *J* = 8.8 Hz, 2H), 7.66 (d, *J* = 7.5 Hz, 2H), 7.91 (d, *J* = 8.8 Hz, 2H), 8.90 (d, *J* = 7.5 Hz, 2H); <sup>11</sup>B NMR (acetone-*d*<sub>6</sub>) δ -24.4 (d, *J* = 134 Hz, 4B), -16.9 (d, *J* = 153 Hz, 4B), 43.6 (s, 1B). Anal. Calcd. for C<sub>41</sub>H<sub>74</sub>B<sub>9</sub>N<sub>3</sub>O<sub>3</sub>: C, 65.28; H, 9.89; N, 5.57. Found: C, 65.39; H, 9.99; N, 5.57.

**2d[Pyr]**: Recrystallized from MeOH (3x) followed by EtOH (2x) giving 0.073 g (71% overall yield based on phenol **5[NMe<sub>4</sub>]**) of pure diazene as yellow needles: <sup>1</sup>H NMR (acetone-*d*<sub>6</sub>) δ 0.40-3.50 (m, 18H, B-H), 0.83 (t, *J* = 7.3 Hz, 3H), 0.85-0.92 (m, 6H), 0.94 (t, *J* = 7.3 Hz, 3H), 1.08-1.44 (m, 18H), 1.45-1.52 (m, 2H), 1.57 (quintet, *J* = 7.0 Hz, 2H), 1.67-1.76 (m, 2H), 1.84-

1.93 (m, 6H), 1.95-2.08 (m, 2H), 4.45 (t,  $J = 6.5$  Hz, 2H), 4.62 (t,  $J = 7.4$  Hz, 2H), 7.25 (d,  $J = 8.8$  Hz, 2H), 7.66 (d,  $J = 7.3$  Hz, 2H), 7.91 (d,  $J = 8.8$  Hz, 2H), 8.90 (d,  $J = 7.3$  Hz, 2H);  $^{11}\text{B}$  NMR (acetone- $d_6$ )  $\delta$  -24.3 (d,  $J = 132$  Hz, 4B), -16.7 (d,  $J = 141$  Hz, 4B), -13.2 (d,  $J = 153$  Hz, 5B), -12.6 (d,  $J = 157$  Hz, 5B), 44.0 (s, 1B); UV (MeCN)  $\lambda_{\text{max}}$  (log  $\epsilon$ ), 247 nm (4.41), 305 nm (4.20), 410 nm (2.7). Anal. Calcd. for  $\text{C}_{37}\text{H}_{74}\text{B}_{19}\text{N}_3\text{O}_3$ : C, 54.57; H, 9.16; N, 5.16. Found: C, 54.85; H, 9.25; N, 5.16.

### General Procedure for Preparation of Esters **1a**[NMe<sub>4</sub>]-**1f**[NMe<sub>4</sub>]

Phenol **4** (1.5 equivalents) was added to a colorless solution of [*closo*-1-CB<sub>9</sub>H<sub>8</sub>-1-COOH-10-C<sub>6</sub>H<sub>13</sub>]<sup>-</sup>NMe<sub>4</sub><sup>+</sup> (**3**[NMe<sub>4</sub>], 1.0 equivalent), DCC (1.0 equivalent), and DMAP (0.1 equivalents) in anhydrous CH<sub>2</sub>Cl<sub>2</sub>. The mixture was stirred overnight at rt, and the reaction progress was monitored by TLC ( $R_f = 0.5$ , CH<sub>3</sub>CN/CH<sub>2</sub>Cl<sub>2</sub>, 1:9). The solvent was removed *in vacuo*, and the crude product was isolated by column chromatography (SiO<sub>2</sub>, CH<sub>3</sub>CN/CH<sub>2</sub>Cl<sub>2</sub>, 1:9). The resulting ester was washed with hot hexane and recrystallized from EtOH/H<sub>2</sub>O or MeOH/H<sub>2</sub>O. Esters **1a**[NMe<sub>4</sub>] and **1b**[NMe<sub>4</sub>] were difficult to crystallize and were converted directly to *N*-butyl-4-heptyloxypyridinium salts (**1**[Pyr]) without further purification.

**1a**[NMe<sub>4</sub>]: The crude product was washed with hot hexane giving 46 mg of ~ 85% pure salt as an oily film that slowly glassified. Attempts to recrystallize from EtOH/H<sub>2</sub>O mixtures were unsuccessful:  $^1\text{H}$  NMR (CDCl<sub>3</sub>) major signals  $\delta$  0.89 (t,  $J = 6.9$  Hz, 3H), 0.91 (t,  $J = 6.9$  Hz, 3H), 1.56 (quintet,  $J = 6.9$  Hz, 2H), 1.78 (quintet,  $J = 7.0$  Hz, 2H), 3.01 (s, 12H), 3.94 (t,  $J = 6.5$  Hz, 2H), 6.92 (d,  $J = 8.8$  Hz, 2H), 7.15 (d,  $J = 8.8$  Hz, 2H);  $^{11}\text{B}$  { $^1\text{H}$ } NMR (acetone- $d_6$ )  $\delta$  -24.1 (4B), -16.1 (4B), 48.7 (1B).

**1b[NMe<sub>4</sub>]:** The crude product was washed with hot hexane giving 0.053 g of ~ 85% pure salt as a semi-crystalline paste. Attempts to recrystallize from EtOH/H<sub>2</sub>O mixtures were unsuccessful: <sup>1</sup>H NMR (acetone-*d*<sub>6</sub>) major signals  $\delta$  0.88 (t,  $J$  = 6.8 Hz, 3H), 0.91 (t,  $J$  = 7.0 Hz, 3H), 1.73 (quintet,  $J$  = 7.4 Hz, 2H), 2.59 (t,  $J$  = 7.4 Hz, 2H), 3.43 (s, 12H), 7.20 (d,  $J$  = 8.9 Hz, 2H), 7.31 (d,  $J$  = 8.9 Hz, 2H); <sup>11</sup>B NMR (acetone-*d*<sub>6</sub>)  $\delta$  -23.9 (d,  $J$  = 129 Hz, 4B), -16.0 (d,  $J$  = 141 Hz, 4B), 48.0 (s, 1B).

**1c[NMe<sub>4</sub>]:** Recrystallized from EtOH/H<sub>2</sub>O mixtures (2x) giving 0.020 g (22% yield) of the pure salt as a white crystalline powder: mp 242 °C (DSC); <sup>1</sup>H NMR (acetone-*d*<sub>6</sub>)  $\delta$  0.40-2.50 (m, 8H, B-H), 0.89 (t,  $J$  = 6.9 Hz, 3H), 0.91 (t,  $J$  = 7.1 Hz, 3H), 0.95-1.10 (m, 2H), 1.15-1.45 (m, 15H), 1.48-1.62 (m, 4H), 1.80-2.00 (m, 4H), 2.14 (br d,  $J$  = 11.2 Hz, 2H), 2.52 (tt,  $J_1$  = 12.2 Hz,  $J_2$  = 3.5 Hz, 1H), 3.43 (s, 12H), 7.18 (d,  $J$  = 8.9 Hz, 2H), 7.31 (d,  $J$  = 8.9 Hz, 2H); <sup>11</sup>B NMR (acetone-*d*<sub>6</sub>)  $\delta$  -23.9 (d,  $J$  = 139 Hz, 4B), -16.0 (d,  $J$  = 145 Hz, 4B), 48.9 (s, 1B).

**1d[NMe<sub>4</sub>]:** Recrystallized from EtOH/H<sub>2</sub>O mixtures (2x) giving 0.041 g (25% yield) of pure salt as a white crystalline powder: mp 226 °C (DSC); <sup>1</sup>H NMR (300 MHz, acetone-*d*<sub>6</sub>)  $\delta$  0.40-3.50 (m, 18H, B-H), 0.83 (t,  $J$  = 7.0 Hz, 3H), 0.91 (t,  $J$  = 7.1 Hz, 3H), 1.10-1.30 (m, 6H), 1.34-1.42 (m, 4H), 1.50-1.60 (m, 2H), 1.68-1.75 (m, 2H), 1.81-1.98 (m, 4H), 3.44 (s, 12H), 7.15 (d,  $J$  = 9.0 Hz, 2H), 7.33 (d,  $J$  = 9.0 Hz, 2H); <sup>11</sup>B NMR (acetone-*d*<sub>6</sub>)  $\delta$  -23.9 (d,  $J$  = 137 Hz, 4B), -15.9 (d,  $J$  = 152 Hz, 4B), -13.2 (d,  $J$  = 160 Hz, 5B), -12.6 (d,  $J$  = 158 Hz, 5B), 49.1 (s, 1B).

**1e[NMe<sub>4</sub>]:** The crude product was washed with hot hexane and recrystallized from EtOH/H<sub>2</sub>O mixtures (2x) giving 10 mg (26% yield) of the pure salt as a white crystalline powder: mp 197 °C (DSC); <sup>1</sup>H NMR (acetone-*d*<sub>6</sub>) δ 0.40-2.50 (m, 8H, B-H), 0.90 (t, *J* = 7.8 Hz, 3H), 0.92 (t, *J* = 7.7 Hz, 3H), 1.05-1.17 (m, 2H), 1.22-1.45 (m, 15H), 1.45-1.62 (m, 4H), 1.85-2.01 (m, 6H), 2.54 (bt, *J* = 12.1 Hz, 1H), 3.45 (s, 12H), 7.19 (d, *J* = 8.5 Hz, 2H), 7.31 (d, *J* = 8.5 Hz, 2H); <sup>11</sup>B NMR (acetone-*d*<sub>6</sub>) δ -23.9 (d, *J* = 132 Hz, 4B), -16.0 (d, *J* = 152 Hz, 4B), 48.3 (s, 1B).

**1f[NMe<sub>4</sub>]:** Recrystallized from EtOH/H<sub>2</sub>O mixtures (2x) giving 0.029 g (23% yield) of the pure salt as a white crystalline powder: mp 201 °C (DSC); <sup>1</sup>H NMR (acetone-*d*<sub>6</sub>) δ 0.40-3.50 (m, 18H, B-H), 0.84 (t, *J* = 7.2 Hz, 3H), 0.91 (t, *J* = 7.0 Hz, 3H), 1.10-1.30 (m, 6H), 1.32-1.43 (m, 4H), 1.55 (quintet, *J* = 7.0 Hz, 2H), 1.67-1.75 (m, 2H), 1.80-1.98 (m, 4H), 3.44 (s, 12H), 7.17 (d, *J* = 8.9 Hz, 2H), 7.34 (d, *J* = 8.8 Hz, 2H); <sup>11</sup>B NMR (acetone-*d*<sub>6</sub>) δ -23.9 (d, *J* = 138 Hz, 4B), -15.9 (d, *J* = 151 Hz, 4B), -12.3 (d, *J* = 164 Hz, 10B), 48.3 (s, 1B).

**Preparation of [*closso*-1-CB<sub>9</sub>H<sub>8</sub>-1-(N=N-C<sub>6</sub>H<sub>4</sub>-OC<sub>9</sub>H<sub>19</sub>-4)-10-C<sub>6</sub>H<sub>13</sub>]<sup>-</sup> NMe<sub>4</sub><sup>+</sup> (**2a**[NMe<sub>4</sub>]).**

A solution of 1-bromononane (0.08 mL, 0.4 mmol) in anhydrous CH<sub>3</sub>CN (2 mL) was added to an orange solution of azophenol **5**[NMe<sub>4</sub>] (0.042 g, 0.106 mmol, about 60% pure; contaminated with NMP) and NMe<sub>4</sub><sup>+</sup>OH<sup>-</sup>·5H<sub>2</sub>O (0.06 g, 0.32 mmol) in anhydrous CH<sub>3</sub>CN (2 mL). The solution was stirred at 50 °C for 4 hr. The reaction mixture was evaporated to dryness, and the crude product was isolated by column chromatography (SiO<sub>2</sub>, CH<sub>3</sub>CN/CH<sub>2</sub>Cl<sub>2</sub>, 1:9). Washing with hot hexane gave 0.068 g of crude diazene **2a**[NMe<sub>4</sub>] as a yellow/green viscous isotropic film that slowly crystallized. Attempts to recrystallize from MeOH or MeOH/H<sub>2</sub>O mixtures were unsuccessful and the product was converted directly to **2a**[Pyr] without further

purification:  $^1\text{H}$  NMR (acetone- $d_6$ ) major signals  $\delta$  0.88 (t,  $J$  = 6.2 Hz, 3H), 0.92 (t,  $J$  = 7.2 Hz, 3H), 3.43 (s, 12H), 4.10 (t,  $J$  = 6.5 Hz, 2H), 7.07 (d,  $J$  = 8.9 Hz, 2H), 7.85 (d,  $J$  = 8.9 Hz, 2H);  $^{11}\text{B}$  NMR (acetone- $d_6$ )  $\delta$  -24.5 (d,  $J$  = 138 Hz, 4B), -17.1 (d,  $J$  = 146 Hz, 4B), 42.8 (s, 1B).

### General Procedure for Preparation of Diazenes **2b**[NHEt<sub>3</sub>], **2c**[NMe<sub>4</sub>], and **2d**[NHEt<sub>3</sub>]

A solution of acid chloride **6** (4.0 equivalents) in anhydrous  $\text{CH}_2\text{Cl}_2$  was added to an orange solution of azophenol **5**[NMe<sub>4</sub>] (about 60% pure; contaminated with NMP) and NEt<sub>3</sub> (5.0 equivalents) in anhydrous  $\text{CH}_2\text{Cl}_2$ . The bright yellow solution was stirred for 12 hrs, and the reaction progress was monitored by TLC ( $R_f$  = 0.5 in  $\text{CH}_3\text{CN}/\text{CH}_2\text{Cl}_2$ , 1:9). The reaction mixture was worked up and the product was isolated as described for esters **1**[NMe<sub>4</sub>]. Attempts to recrystallize from MeOH or MeOH/H<sub>2</sub>O mixtures were unsuccessful and without crystallization further purification, the resulting diazenes **2b**[NHEt<sub>3</sub>], **2c**[NMe<sub>4</sub>], or **2d**[NHEt<sub>3</sub>] were converted to the pyridinium salts **2**[Pyr].

**2b**[NHEt<sub>3</sub>]: Washing with hot hexane gave 0.073 g (135% yield) of crude diazene as a yellow/green viscous isotropic film, which slowly crystallized:  $^1\text{H}$  NMR (acetone- $d_6$ ) major signals  $\delta$  0.89 (t,  $J$  = 6.5 Hz, 3H), 0.92 (t,  $J$  = 6.9 Hz, 3H), 1.38 (t,  $J$  = 7.3 Hz, 9H), 1.58 (quintet,  $J$  = 7.1 Hz, 2H), 1.75 (quintet,  $J$  = 7.4 Hz, 2H), 2.63 (t,  $J$  = 7.4 Hz, 2H), 3.42 (q,  $J$  = 7.3 Hz, 6H), 7.31 (d,  $J$  = 8.7 Hz, 2H), 7.92 (d,  $J$  = 8.7 Hz, 2H);  $^{11}\text{B}$  NMR (acetone- $d_6$ )  $\delta$  -24.4 (d,  $J$  = 137 Hz, 4B), -16.9 (d,  $J$  = 146 Hz, 4B), 43.7 (s, 1B).

**2c**[NMe<sub>4</sub>]: Washing with hot hexane gave 0.095 g (110% yield) of crude diazene as a yellow/green viscous isotropic film that slowly crystallized:  $^1\text{H}$  NMR (acetone- $d_6$ ) major signals

$\delta$  0.89 (t,  $J$  = 6.9 Hz, 3H), 0.92 (t,  $J$  = 7.0 Hz, 3H), 2.54 (tt,  $J_1$  = 12.2 Hz,  $J_2$  = 3.5 Hz, 1H), 3.43 (s, 12H), 7.29 (d,  $J$  = 8.8 Hz, 2H), 7.91 (d,  $J$  = 8.7 Hz, 2H);  $^{11}\text{B}$  { $^1\text{H}$ } NMR (acetone- $d_6$ )  $\delta$  -24.4 (4B), -16.9 (4B), 43.3 (s, 1B).

**2d[NHEt<sub>3</sub>]:** Washing with hot hexane gave 0.087 g (105% yield) of ~ 95% pure diazene as a yellow/green viscous isotropic film that slowly crystallized: mp 155 °C,  $^1\text{H}$  NMR (acetone- $d_6$ )  $\delta$  0.40-3.50 (m, 18H, B-H), 0.83 (t,  $J$  = 7.2 Hz, 3H), 0.91 (t,  $J$  = 7.0 Hz, 3H), 1.06-1.30 (m, 6H), 1.33-1.43 (m, 4H), 1.37 (t,  $J$  = 7.3 Hz, 9H), 1.52-1.61 (m, 2H), 1.67-1.76 (m, 2H), 1.84-2.00 (m, 4H), 3.39 (q,  $J$  = 7.3 Hz, 6H), 7.25 (d,  $J$  = 8.8 Hz, 2H), 7.91 (d,  $J$  = 8.8 Hz, 2H);  $^{11}\text{B}$  NMR (acetone- $d_6$ )  $\delta$  -24.3 (d,  $J$  = 137 Hz, 4B), -16.7 (d,  $J$  = 157 Hz, 4B), -13.2 (d,  $J$  = 151 Hz, 5B), -12.6 (d,  $J$  = 158 Hz, 5B), 43.1 (s, 1B).

### Preparation of [*closo*-1-CB<sub>9</sub>H<sub>8</sub>-1-COOH-10-C<sub>6</sub>H<sub>13</sub>]<sup>-</sup>NMe<sub>4</sub><sup>+</sup> (3[NMe<sub>4</sub>])

To a 100 mL three-necked flask, under inert atmosphere, equipped with a magnetic stir bar, reflux condenser, septum, and a glass stopcock was suspended solid anhydrous ZnCl<sub>2</sub> (2.29 g, 16.8 mmol) in anhydrous THF (16 mL). C<sub>6</sub>H<sub>13</sub>MgBr in Et<sub>2</sub>O (9.2 mL, 16.0 mmol, 1.74 M) was added, and the exothermic reaction was stirred briefly (15 min) producing a white precipitate. Anhydrous NMP (8 mL), Pd<sub>2</sub>dba<sub>3</sub> (0.061 g, 0.067 mmol), and [HPCy<sub>3</sub>]<sup>+</sup>BF<sub>4</sub><sup>-</sup> (0.099 g, 0.268 mmol) were added, and the reaction mixture turned dark green and slowly faded to red/orange. After 5 mins, acid<sup>1</sup> [*closo*-1-CB<sub>9</sub>H<sub>8</sub>-1-COOH-10-I]<sup>-</sup>NMe<sub>4</sub><sup>+</sup> (**8[NMe<sub>4</sub>]**, 0.482 g, 1.33 mmol) was added. The septum was replaced with an additional glass stopcock, and the reaction was stirred at 85°C overnight. After brief heating, the reaction turned from red/orange to black. Sat. NH<sub>4</sub>Cl (50 mL) was added, excess THF was removed *in vacuo*, and the remaining aqueous

layer was extracted with Et<sub>2</sub>O (3 x 20 mL). The organic layers were combined, dried (Na<sub>2</sub>SO<sub>4</sub>), and removed giving a black sludge. Excess NMP and 1-hexanol were removed under vacuum (60 °C, 0.5 mm Hg) and the residue (1.13 g) was separated by column chromatography (SiO<sub>2</sub>, CH<sub>3</sub>CN/CH<sub>2</sub>Cl<sub>2</sub>, 1:4) giving 0.586 g of [*closo*-1-CB<sub>9</sub>H<sub>8</sub>-1-COOH-10-C<sub>6</sub>H<sub>13</sub>]<sup>-</sup>H<sub>3</sub>O<sup>+</sup> (**3**[H<sub>3</sub>O]) as a yellow/orange oil, which contained remnant NMP by <sup>1</sup>H NMR: <sup>11</sup>B {<sup>1</sup>H} NMR (CD<sub>3</sub>CN) δ -24.3 (4B), -16.6 (4B), 47.3 (1B).

The crude acid extract was redissolved in 10 % HCl (50 mL) and extracted with Et<sub>2</sub>O (3 x 20 mL). The organic layers were combined, and H<sub>2</sub>O (10 mL) was added. The Et<sub>2</sub>O was removed *in vacuo*, and the aqueous layer was filtered. NMe<sub>4</sub><sup>+</sup>Cl<sup>-</sup> (0.150 g, 1.37 mmol) was added to the filtrate, and a white precipitate formed, which was filtered, washed (H<sub>2</sub>O), and dried *in vacuo* giving 0.383 g (89% yield) of pure **3**[NMe<sub>4</sub>]: mp 135 °C dec; <sup>1</sup>H NMR (acetone-*d*<sub>6</sub>) δ 0.40-2.50 (m, 8H, B-H), 0.91 (t, *J* = 7.0 Hz, 3H), 1.35-1.41 (m, 4H), 1.56 (quintet, *J* = 6.9 Hz, 2H), 1.81-1.96 (m, 4H), 3.45 (s, 12H); <sup>11</sup>B NMR (acetone-*d*<sub>6</sub>) δ -24.1 (d, *J* = 147 Hz, 4B), -16.5 (d, *J* = 157 Hz, 4B), 46.8 (s, 1B); MS (FAB): *m/z* 244-248 (M-H, max at 247, 100%); FAB-HRMS(-): Calcd. for C<sub>8</sub>H<sub>22</sub>B<sub>9</sub>O<sub>2</sub> *m/z*: 249.2460; found; 249.2464.

#### Preparation of [*closo*-1-CB<sub>9</sub>H<sub>8</sub>-1-(N=N-C<sub>6</sub>H<sub>4</sub>-OH-4)-10-C<sub>6</sub>H<sub>13</sub>]<sup>-</sup>NMe<sub>4</sub><sup>+</sup> (**5**[NMe<sub>4</sub>])

To a 100 mL three-necked flask, under inert atmosphere, equipped with a magnetic stir bar, septum, and two glass stopcocks was suspended solid anhydrous ZnCl<sub>2</sub> (1.04 g, 7.62 mmol) in anhydrous THF (5 mL). C<sub>6</sub>H<sub>13</sub>MgBr in Et<sub>2</sub>O (9.2 mL, 16.0 mmol, 1.74 M) was added, and the exothermic reaction was stirred briefly (15 min) producing a white precipitate. Anhydrous LiCl (0.3 g, 6.93 mmol) dissolved in anhydrous THF (10 mL) was added producing a homogenous solution. Anhydrous NMP (8 mL), Pd<sub>2</sub>dba<sub>3</sub> (0.019 g, 0.021 mmol), and [HPCy<sub>3</sub>]<sup>+</sup>

$\text{BF}_4^-$  (0.031 g, 0.084 mmol) were added subsequently, and the reaction mixture turned dark green and slowly faded to red/orange. After 5 mins, [*closo*-1- $\text{CB}_9\text{H}_8$ -1-( $\text{N}=\text{N}-\text{C}_6\text{H}_4-\text{OH}-4$ )-10- $\text{I}$ ] $\text{NMe}_4^+$  (**9**[**NMe<sub>4</sub>**], 0.275 g, 0.63 mmol) was added, and the reaction was stirred at rt overnight. Sat.  $\text{NH}_4\text{Cl}$  (25 mL) was added, THF was removed *in vacuo*, and the remaining aqueous layer was extracted with  $\text{Et}_2\text{O}$  (3 x 20 mL). The organic layers were combined, dried ( $\text{Na}_2\text{SO}_4$ ), and solvents removed giving a residue as a black sludge. Excess NMP and 1-hexanol were removed under vacuum (60 °C, 0.5 mm Hg) and the resulting residue (0.740 g) was separated by column chromatography ( $\text{SiO}_2$ ,  $\text{CH}_3\text{CN}/\text{CH}_2\text{Cl}_2$ , 1:4) giving 0.370 g of (**5**[**H<sub>3</sub>O**]) as a yellow/orange film which solidified on standing:  $^1\text{H}$  NMR ( $\text{CD}_3\text{CN}$ ) major signals  $\delta$  0.95 (t,  $J$  = 7.0 Hz, 3H), 6.99 (d,  $J$  = 8.8 Hz, 2H), 7.79 (d,  $J$  = 8.8 Hz, 2H), 8.21 (s, 1H);  $^{11}\text{B}$  NMR ( $\text{CD}_3\text{CN}$ )  $\delta$  -24.8 (d,  $J$  = 138 Hz, 4B), -17.4 (d,  $J$  = 150 Hz, 4B), 42.7 (s, 1B).

The crude acid extract was redissolved in 10% HCl (50 mL) and extracted with  $\text{Et}_2\text{O}$  (3 x 20 mL). The deep red organic layers were combined, and  $\text{H}_2\text{O}$  (10 mL) was added. The  $\text{Et}_2\text{O}$  was removed *in vacuo* giving a red film deposit.  $\text{H}_2\text{O}$  was decanted, and the red film was further washed with  $\text{H}_2\text{O}$ . The water was filtered, and any insoluble matter was recombined with the red film using  $\text{CH}_2\text{Cl}_2$  (10 mL).  $\text{NMe}_4^+\text{Cl}^-$  (0.093 g, 0.85 mmol) dissolved in  $\text{H}_2\text{O}$  (10 mL) was added, and the biphasic mixture was vigorously stirred for 1 hr. The deep red organic layer slowly began to turn light orange as a result. The organic layer was separated, and the  $\text{H}_2\text{O}$  was further extracted with  $\text{CH}_2\text{Cl}_2$ . The organic layers were combined, dried ( $\text{Na}_2\text{SO}_4$ ), and solvent evaporated giving 320 mg (67% yield) of ~60% pure **5**[**NMe<sub>4</sub>**] (contains ~40% NMP by  $^1\text{H}$  NMR) as a yellow/orange viscous film:  $^1\text{H}$  NMR ( $\text{CD}_3\text{CN}$ ) major signals  $\delta$  0.93 (t,  $J$  = 7.0 Hz, 3H), 1.57 (quintet,  $J$  = 7.0 Hz, 2H), 3.05 (s, 12H), 6.96 (d,  $J$  = 8.8 Hz, 2H), 7.77 (d,  $J$  = 8.8 Hz, 2H);  $^{11}\text{B}$  NMR ( $\text{CD}_3\text{CN}$ )  $\delta$  -24.8 (d,  $J$  = 139 Hz, 4B), -17.4 (d,  $J$  = 150 Hz, 4B), 42.6 (s, 1B);

MS (FAB):  $m/z$  320-327 (M-H, max at 324, 100%); FAB-HRMS(-): calcd. for  $C_{13}H_{26}B_9N_2O$   
 $m/z$ : 325.2883; found; 325.2877.

### Preparation of *N*-Butyl-4-heptyloxyppyridinium bromide (7)

4-Heptyloxyppyridine<sup>2</sup> (1.00 g, 5.2 mmol) and 1-bromobutane (1.67 mL, 15.6 mmol) dissolved in anhydrous  $CH_3CN$  (10 mL) were stirred at reflux for 6 hrs. Solvent was removed *in vacuo*, and the crude product (1.68 g) was passed through a short silica gel plug ( $CH_3CN/CH_2Cl_2$ , 1:9) giving 1.30 g (77% yield) of the pure salt **7** as a colorless oil, which slowly crystallized: mp 34 °C;  $^1H$  NMR (300 MHz,  $CDCl_3$ )  $\delta$  0.85 (t,  $J$  = 6.7 Hz, 3H), 0.92 (t,  $J$  = 7.4 Hz, 3H), 1.26-1.40 (m, 10H), 1.82 (quintet,  $J$  = 7.1 Hz, 2H), 1.95 (quintet,  $J$  = 7.2 Hz, 2H), 4.24 (t,  $J$  = 6.3 Hz, 2H), 4.70 (t,  $J$  = 7.3 Hz, 2H), 7.42 (d,  $J$  = 6.5 Hz, 2H), 9.21 (d,  $J$  = 6.6 Hz, 2H); UV (MeCN)  $\lambda_{max}$  246 nm (log  $\epsilon$  = 4.20), ( $CH_2ClCH_2Cl$ )  $\lambda_{max}$  244 nm (log  $\epsilon$  = 4.6). Anal. Calcd. for  $C_{16}H_{28}BrNO$ : C, 58.18; H, 8.54; N, 4.24; Found: C, 56.06; H, 8.77; N, 4.40.

### Preparation of [*clos*o-1-CB<sub>9</sub>H<sub>8</sub>-1-(N=N-C<sub>6</sub>H<sub>4</sub>-OH-4)-10-I]<sup>-</sup>NMe<sub>4</sub><sup>+</sup> (9[NMe<sub>4</sub>])

[*Clos*o-1-CB<sub>9</sub>H<sub>8</sub>-1-N<sub>2</sub>-10-I] (**11**, 0.368 g, 1.14 mmol) was slowly added to a solution of NMe<sub>4</sub><sup>+</sup>OH<sup>-</sup> · 5H<sub>2</sub>O (2.5 g, 13.60 mmol) and phenol (1.27 g, 13.5 mmol) in H<sub>2</sub>O/ $CH_3CN$  (1:4 vol/vol) at 5 °C. Upon addition of **11**, an orange solution formed. The reaction was warmed to rt, and stirring continued for 1 hr. The reaction mixture was acidified with 10 % HCl and  $CH_3CN$  was removed *in vacuo*. The aqueous solution was extracted with Et<sub>2</sub>O (3 x 20 mL), or until the organic layer was no longer colored. The organic layers were combined, dried (Na<sub>2</sub>SO<sub>4</sub>), and solvent evaporated giving 1.65 g of a crude product as a red/orange oil. The

crude product was purified by column chromatography (SiO<sub>2</sub>, CH<sub>3</sub>CN/CH<sub>2</sub>Cl<sub>2</sub>, 1:6) giving 0.531 g of [*closo*-1-CB<sub>9</sub>H<sub>8</sub>-1-(N=N-C<sub>6</sub>H<sub>4</sub>-OH-4)-10-I]<sup>-</sup>H<sub>3</sub>O<sup>+</sup> (**9**[H<sub>3</sub>O]) as a yellow/orange film that slowly crystallized: <sup>1</sup>H NMR (CD<sub>3</sub>CN) δ 6.97 (d, *J* = 8.8 Hz, 2H); 7.80 (d, *J* = 8.8 Hz, 2H); <sup>11</sup>B {<sup>1</sup>H} NMR (CD<sub>3</sub>CN) δ -20.5 (4B), -16.1 (4B), 17.3 (1B).

The crude phenol was redissolved in Et<sub>2</sub>O (10 mL), H<sub>2</sub>O (8 mL) was added, and the Et<sub>2</sub>O was removed *in vacuo*. The mother liquor was separated from a yellow insoluble material (0.105 g), and NMe<sub>4</sub><sup>+</sup> Cl<sup>-</sup> (0.125 g, 1.14 mmol) was added to the mother liquor. The precipitate was filtered and dried *in vacuo* giving 0.356 g of **9**[NMe<sub>4</sub>] as a yellow solid. <sup>1</sup>H and <sup>11</sup>B NMR analysis demonstrated that the insoluble material from removal of Et<sub>2</sub>O was also **9**[NMe<sub>4</sub>]. The combined yield of **9**[NMe<sub>4</sub>] was 0.461 g (93% yield). A small portion of the product was recrystallized from hot CH<sub>3</sub>OH/H<sub>2</sub>O layered with hexane, which upon cooling gave yellow crystalline leaflets for analysis: mp 100 °C dec; <sup>1</sup>H NMR (CD<sub>3</sub>CN) δ 0.4-2.50 (m, 8H, B-H), 3.05 (s, 12H), 6.97 (d, *J* = 8.8 Hz, 2H), 7.45 (s, 1H), 7.80 (d, *J* = 8.4 Hz, 2H); <sup>11</sup>B NMR (CD<sub>3</sub>CN) δ -20.5 (d, *J* = 148 Hz, 4B), -16.1 (d, *J* = 160 Hz, 4B), 17.2 (s, 1B). Anal. Calcd. for C<sub>11</sub>H<sub>25</sub>B<sub>9</sub>IN<sub>3</sub>O: C, 30.06; H, 5.73; N, 9.56. Found: C, 29.47; H, 5.95; N, 9.21.

#### Characterization of [*closo*-1-CB<sub>9</sub>H<sub>8</sub>-1-COOH-10-PCy<sub>3</sub>] (**10**).

Phosphonium zwitterion **10** was isolated from the main fraction of acid **3**[H<sub>3</sub>O] separated by chromatography from the reaction mixture of iodo acid **8**[NMe<sub>4</sub>] (0.225 g, 0.62 mmol), hexylzinc chloride (3.1 mmol), [HPCy<sub>3</sub>]<sup>+</sup>BF<sub>4</sub><sup>-</sup> (0.018 g, 0.050 mmol), and Pd<sub>2</sub>dba<sub>3</sub> (0.011 g, 0.012 mmol) as described above. Thus, washing the acid fraction (0.192 g) with CH<sub>3</sub>OH gave 10 mg (~ 3% yield) of insoluble material identified as the phosphonium zwitterion **10**: <sup>1</sup>H NMR (acetone-*d*<sub>6</sub>) δ 0.40-2.50 (m, 8H, B-H), 1.30-1.48 (m, 10H), 1.74-1.76 (m, 3H),

1.81-1.91 (m, 11H), 2.22-2.25 (m, 6H), 2.66 (q,  $J = 11.9$  Hz, 3H), COOH not observed;  $^{11}\text{B}$  NMR (acetone- $d_6$ )  $\delta$  -19.5 (d,  $J = 125$  Hz, 4B), -13.4 (d,  $J = 158$  Hz, 4B), 21.7 (d,  $J = 189$  Hz, 1B); MS (FAB):  $m/z$  439-445 (M-H, max at 443, 100%); FAB-HRMS(+): calcd. for  $\text{C}_{20}\text{H}_{42}\text{B}_9\text{O}_2\text{P}$   $m/z$ : 444.3760; found; 444.3758.

### Preparation of [*closo*-1- $\text{CB}_9\text{H}_8$ -1- $\text{N}_2$ -10-I] (**11**).<sup>3</sup>

A suspension of [*closo*-1- $\text{CB}_9\text{H}_8$ -1-NHBoc-10-I] $^-$   $\text{NEt}_4^+$  (**12**[**NEt**<sub>4</sub>], 1.18 g, 2.41 mmol) in a 1:3 mixture of conc. HCl and  $\text{CH}_3\text{OH}$  (50 mL) was heated gently until all solids dissolved, and stirring was continued at rt for 18 hrs.  $\text{H}_2\text{O}$  (20 mL) was added and  $\text{CH}_3\text{OH}$  was removed *in vacuo*. Conc. HCl (3 mL) was added, and the resulting solution was extracted with  $\text{Et}_2\text{O}$  (3 x 30 mL). The organic layers were combined, dried ( $\text{Na}_2\text{SO}_4$ ), and solvents evaporated *in vacuo* to give 0.604 g of crude [*closo*-1- $\text{CB}_9\text{H}_8$ -1- $\text{NH}_3$ -10-I] as a transparent film, which slowly solidified as a light brown glass:  $^1\text{H}$  NMR ( $\text{CD}_3\text{CN}$ )  $\delta$  8.55 (s);  $^{11}\text{B}$  NMR ( $\text{CD}_3\text{CN}$ )  $\delta$  -21.3 (d,  $J = 145$  Hz, 4B), -16.3 (d,  $J = 156$  Hz, 4B), 16.9 (s, 1B); IR 3185 and 3123 (N-H)  $\text{cm}^{-1}$ .

The crude product was dissolved in a 1:1 mixture of  $\text{AcOH}/\text{H}_2\text{O}$  (6 mL), and an aqueous solution of  $\text{NaNO}_2$  (0.183 g, 2.65 mmol) in  $\text{H}_2\text{O}$  (4 mL) was added dropwise (~1 drop/sec) at 0 °C. Immediately, a white precipitate began to form. The reaction temperature was maintained for 30 min,  $\text{H}_2\text{O}$  (2 mL) was added, and the precipitate was filtered and dried to give 0.577 g (88% yield) of **11** as a white crystalline solid: mp 106 °C dec;  $^1\text{H}$  NMR ( $\text{CD}_3\text{CN}$ )  $\delta$  1.28 (q,  $J = 156$  Hz, 4H), 2.59 (q,  $J = 170$  Hz, 4H);  $^{11}\text{B}$  NMR ( $\text{CD}_3\text{CN}$ )  $\delta$  -18.3 (d,  $J = 152$  Hz, 4B), -8.8 (d,  $J = 169$  Hz, 4B), 34.6 (s, 1B); IR 2245 ( $\text{N}_2$ )  $\text{cm}^{-1}$ .

### Preparation of [*closo*-1- $\text{CB}_9\text{H}_8$ -1-NHBoc-10-I] $^-$ $\text{NEt}_4^+$ (**12**[**NEt**<sub>4</sub>]).

A suspension of acid<sup>1</sup> [*closo*-1-CB<sub>9</sub>H<sub>8</sub>-1-COOH-10-I]<sup>-</sup>NEt<sub>4</sub><sup>+</sup> (**8[*NMe*4]**, 2.94 g, 7.02 mmol) in anhydrous CH<sub>2</sub>Cl<sub>2</sub> (30 mL) was treated with neat (COCl)<sub>2</sub> (0.65 mL, 7.72 mmol). Vigorous bubbling of CO and CO<sub>2</sub> gases was observed followed by the dissolution of the substrate and the formation of a clear slight yellow solution. The solution was stirred for 1 hr at rt followed by filtration to remove insoluble particulates. The mother liquor was evaporated to dryness giving 3.10 g of crude [*closo*-1-CB<sub>9</sub>H<sub>8</sub>-1-COCl-10-I]<sup>-</sup>NEt<sub>4</sub><sup>+</sup> as a white solid: <sup>11</sup>B {<sup>1</sup>H} NMR δ (CD<sub>3</sub>CN) -19.3 (4B), -13.6 (4B), 23.4 (1B); IR 2582 (B-H), 1772 (C=O) cm<sup>-1</sup>.

Crude [*closo*-1-CB<sub>9</sub>H<sub>8</sub>-1-COCl-10-I]<sup>-</sup>NEt<sub>4</sub><sup>+</sup> (3.10 g, 7.02 mmol) was dissolved in anhydrous CH<sub>2</sub>Cl<sub>2</sub> (10 mL) and added via syringe to solid anhydrous ZnCl<sub>2</sub> (0.096 g, 0.702 mmol) under N<sub>2</sub> atmosphere. The reaction mixture was cooled to 0 °C, and Me<sub>3</sub>SiN<sub>3</sub> (1.01 mL, 7.72 mmol) was added at once. The reaction mixture was stirred at 0 °C for an additional 30 min after which it was stirred for 4 hrs at rt. The reaction mixture was poured into ice-cold H<sub>2</sub>O (50 mL) and extracted with CH<sub>2</sub>Cl<sub>2</sub> (3 x 20 mL). The organic layers were combined, dried (MgSO<sub>4</sub>), filtered, and solvent was removed *in vacuo* giving 3.09 g of crude [*closo*-1-CB<sub>9</sub>H<sub>8</sub>-1-CON<sub>3</sub>-10-I]<sup>-</sup>NEt<sub>4</sub><sup>+</sup> as a white crystalline solid: <sup>11</sup>B {<sup>1</sup>H} NMR (CD<sub>3</sub>CN) δ -19.7 (4B), -14.9 (4B), 21.5 (1B); IR 2570 and 2523 (B-H), 2137 (N<sub>3</sub>), 1686 (C=O) cm<sup>-1</sup>. The crude product was contaminated with about 15% of [*closo*-1-CB<sub>9</sub>H<sub>8</sub>-1-COOH-10-I]<sup>-</sup>NEt<sub>4</sub><sup>+</sup> (**8[*NEt*4]**)

Crude [*closo*-1-CB<sub>9</sub>H<sub>8</sub>-1-CON<sub>3</sub>-10-I]<sup>-</sup>NEt<sub>4</sub><sup>+</sup> (3.09 g, 6.96 mmol) was dissolved in anhydrous CH<sub>3</sub>CN (30 mL) and refluxed for 1 hr. The reaction was cooled to rt, solvent removed, and the residue was dried *in vacuo* giving 2.90 g of crude [*closo*-1-CB<sub>9</sub>H<sub>8</sub>-1-NCO-10-I]<sup>-</sup>NEt<sub>4</sub><sup>+</sup> as a slight yellow solid: <sup>11</sup>B {<sup>1</sup>H} NMR (CD<sub>3</sub>CN) δ -22.0 (4B), -15.5 (4B), 13.8 (1B); IR 2564 and 2525 (B-H), 2265 (N=C=O) cm<sup>-1</sup>.

A solution of anhydrous *tert*-butanol (3.33 mL, 34.85 mmol), anhydrous CH<sub>3</sub>CN (30 mL), and crude [*closo*-1-CB<sub>9</sub>H<sub>8</sub>-1-NCO-10-I]<sup>−</sup> NEt<sub>4</sub><sup>+</sup> (2.90 g, 6.97 mmol) was stirred at reflux for 2 hr after which solvents were removed leaving 3.06 g of crude **12**[NEt<sub>4</sub>] as a yellow solid. The crude solid was dissolved in CH<sub>2</sub>Cl<sub>2</sub> and passed through a silica gel plug first washed with 2% NEt<sub>3</sub> in CH<sub>2</sub>Cl<sub>2</sub>. Elution with a buffered CH<sub>3</sub>CN/CH<sub>2</sub>Cl<sub>2</sub> solution (2% NEt<sub>3</sub>, 10% CH<sub>3</sub>CN, 88% CH<sub>2</sub>Cl<sub>2</sub>) afforded 1.98 g (53% yield based on starting acid [*closo*-1-CB<sub>9</sub>H<sub>8</sub>-1-COOH-10-I]<sup>−</sup> NEt<sub>4</sub><sup>+</sup>) of pure **12**[NEt<sub>4</sub>] as a slight yellow solid. A small portion of the product was recrystallized from aqueous EtOH for analysis: mp 156-158 °C; <sup>1</sup>H NMR (CD<sub>3</sub>CN) δ 0.40-2.50 (m, 8H, B-H), 1.20 (t, *J* = 7.2 Hz, 12H), 1.48 (s, 9H), 3.15 (q, *J* = 7.2 Hz, 8H), 7.08 (s, 1H); <sup>11</sup>B NMR (CD<sub>3</sub>CN) δ -22.1 (d, *J* = 142 Hz, 4B), -16.7 (d, *J* = 155 Hz, 4B), 13.0 (1B); IR 3305 and 3233 (N-H), 2564 and 2520 (B-H), 1679 (C=O) cm<sup>−1</sup>. Anal. Calcd. for C<sub>14</sub>H<sub>38</sub>B<sub>9</sub>IN<sub>2</sub>O<sub>2</sub>: C, 34.27; H, 7.81; N, 5.71. Found: C, 34.32; H, 7.79; N, 5.71.

Further elution gave 0.75 g of a 90:10 mixture of **12**[NEt<sub>4</sub>] and starting acid [*closo*-1-CB<sub>9</sub>H<sub>8</sub>-1-COOH-10-I]<sup>−</sup> NEt<sub>4</sub><sup>+</sup> (**8**[NEt<sub>4</sub>]).

#### 4. Computational Details

Geometry optimization for **1d**[Pyr], **1f**[Pyr], and **2d**[Pyr] was undertaken without symmetry constraints and default convergence limits with the HF/6-31G(d) method using the Gaussian 98 computational package.<sup>4</sup> The optimized geometries of the models were perturbed several times to assure conformational minimum and the fully optimized structures are shown in Figure S9.

Geometry optimizations with smaller basis set (3-21G\*) gave the unrealistic dihedral angle between the carboxyl group and the phenyl ring (COO–Ph). While the angle typically

found in solid-state structures is in the range of  $45^{\circ}$ – $90^{\circ}$ , the HF/3-21G(d) level calculations optimized these two groups as coplanar. Realistic geometries were obtained using the HF/6-31G(d) method.

**1d**

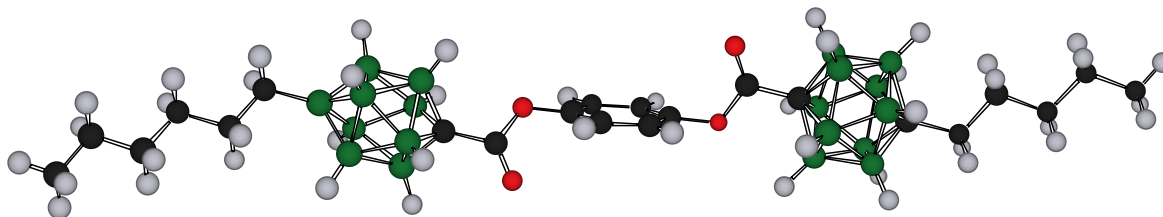

**1f**

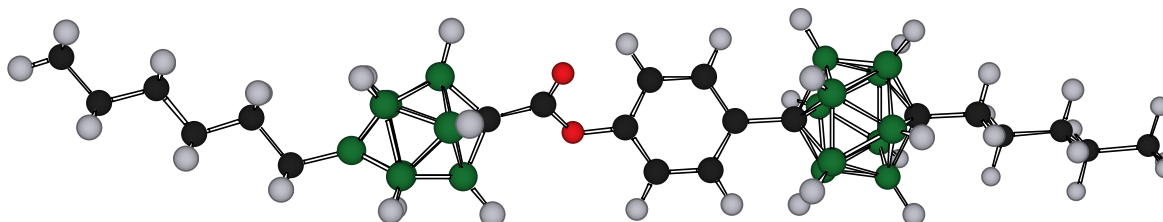

**2d**

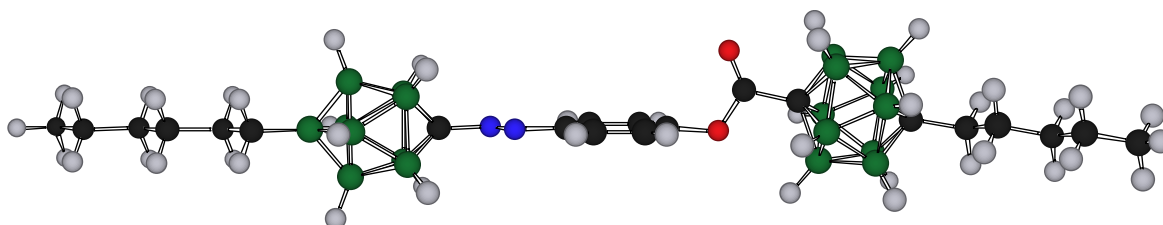

Figure S9. Molecular structures of anions **1d**, **1f**, and **2d** obtained by full geometry optimization at the HF/6-31G(d) level of theory.

## 5. Archive for HF/6-31G(d) computational results

**1d [Pyr]**

```
1\1\GINC-MONSTER\FOpt\RHF\6-31G(d)\C22H46B19O4(1-)\PIOTR\27-Feb-2009\0
\\#P HF/6-31G* FOPT GEOM(NOANGLE,NODISTANCE) FCHECK\\C6-CB9-COO-Ph-OCO
-C2B10-C5\\-1,1\B,-1.472281901,-1.891792648,-5.5640765733\B,0.09694452
26,0.4445953602,6.0278543523\B,0.9582606401,2.0214713824,6.0685636989\
B,-0.1590654164,-0.5680985219,-5.5183583448\B,1.2810195044,-0.83054897
```

83,5.6010574292\B,-1.4664850599,0.7212046433,-5.3039051623\B,2.6732374  
677,1.7218559274,5.6569957207\B,-2.7786684128,-0.603977196,-5.35053019  
78\B,2.8709187498,-0.0400911823,5.3624352573\B,-2.4919309858,-1.367811  
4934,-6.9756394537\B,3.3617291335,0.6795977544,6.9107497278\B,-0.64059  
06889,-1.3511918141,-7.0872706386\B,-0.6443018991,0.4958048255,-6.9098  
76671\B,2.1832419571,1.9480247039,7.3386087199\B,2.5045855052,-0.88503  
28623,6.8731104052\B,-2.4955386398,0.4772638918,-6.7837032135\B,-1.638  
1537299,-0.3263302802,-8.0297996391\B,0.599666178,1.1620954227,7.57349  
10122\B,0.7989757145,-0.5870917862,7.2822371295\C,-1.4076843016,-0.676  
0320159,-4.5133458599\H,0.2105698977,-1.3599743279,7.9510974498\C,-1.3  
375905556,-0.8516920015,-3.0493925944\H,-0.1256156367,1.534525414,8.42  
67040057\O,-0.4353377728,-0.0096705219,-2.491333872\C,-0.1842225485,-0  
.0488793413,-1.1490686898\H,3.0445724063,-1.8550262449,7.2712588373\C,  
-1.1724463093,0.1965740901,-0.2098954779\H,2.5041623415,2.8544269933,8  
.0160046568\C,-0.8465634941,0.2121332626,1.1335660632\H,4.4655344062,0  
.7325654623,7.3249484349\C,0.4603270391,-0.0084188341,1.5160345483\H,3  
.5895894447,-0.4093731908,4.5048975681\C,1.4505712336,-0.2480569782,0  
.5906526816\H,3.2607670568,2.4903079031,4.9894734853\C,1.1220050419,-0  
.2682109903,-0.7549017956\H,0.9598081351,-1.7278351346,4.9162430407\H,-  
1.4298935228,-3.0030826367,-5.153935749\H,0.4183307569,2.9869785068,5  
.6718630523\H,0.9417801861,-0.6172153926,-5.0780057487\H,-1.0020309582,  
0.3926434158,5.6063005068\H,-1.4436722248,1.7345735958,-4.688109664\C,  
2.0594910253,0.3541787464,7.9831440193\H,-3.8080450339,-0.6592895233,-  
4.7647788319\C,1.4110564661,0.7728744578,4.9756729123\H,-3.3089773941,  
-2.1264031809,-7.3981676196\C,2.3652091827,0.0691943138,9.4652815144\H  
,0.1308325149,-2.0929000554,-7.6158503066\C,2.7807619509,1.2646561963,  
10.324679636\H,0.1187570825,1.3325924197,-7.2865797938\C,3.0550684079,  
0.8474012327,11.7716036129\H,-3.3144899932,1.303063953,-7.0519257723\C  
,3.473768675,2.0186084642,12.6622303438\C,-1.7135687152,-0.1377241997,  
-9.6243286609\C,-2.7447829092,-1.0153669083,-10.3455779551\C,-2.781969  
1814,-0.7984072448,-11.8611180805\C,-3.8102707771,-1.6738965608,-12.58  
08133108\C,-3.8474130809,-1.4570327382,-14.0950704716\C,-4.8776068854,  
-2.3360203113,-14.8047874051\H,-4.669618383,-3.3904507006,-14.64358085  
45\H,-5.8804524832,-2.1399022429,-14.4347820727\H,-4.8804514558,-2.159  
69896,-15.8772909465\H,-4.0628772783,-0.4108137206,-14.3039239206\H,-2  
.8608330836,-1.6522710329,-14.5112084375\H,-3.5973616331,-2.7221219949  
, -12.3753425896\H,-4.7994907821,-1.4805354762,-12.1680497048\H,-2.9961  
952457,0.2495887744,-12.0693818239\H,-1.793463701,-0.9926573494,-12.27  
67083521\H,-2.5352441501,-2.0635420068,-10.1415154947\H,-3.7342679554,  
-0.8244953676,-9.9346800649\H,-1.9288544895,0.907166181,-9.8523848707\H  
, -0.730916266,-0.3326505223,-10.0563023627\C,3.7473442793,1.600671809  
7,14.1065595693\H,-2.1832111184,0.3578313373,-0.527953657\H,-1.6000983  
655,0.389900712,1.8782164883\O,0.7730324397,-0.0623887634,2.8740423197  
\C,1.1075748325,1.0451005727,3.5122115792\O,1.1713235598,2.1218451422,  
3.0330489367\H,2.4597729192,-0.4222377535,0.9148853462\H,1.8683707818,  
-0.4508728969,-1.5046448446\H,2.8645089209,1.1601644807,14.561377183\H  
,4.5460298596,0.8659668735,14.157749711\H,4.0417863297,2.4517380131,14  
.71289067\H,4.3638016497,2.4861002106,12.2469809903\H,2.6951842699,2.7  
780299335,12.6475187605\H,2.164886375,0.3800428884,12.1894243137\H,3.8  
349416712,0.0878344916,11.7885592185\H,3.6708628286,1.7276092801,9.909  
3307131\H,2.0007018574,2.0199079298,10.3102622417\H,1.4839101118,-0.38  
80111873,9.9005415366\H,3.1483436365,-0.6795339741,9.5012148038\O,-1.9  
67007444,-1.6163270784,-2.398554184\\Version=x86-Linux-G98RevA.9\HF=-1  
628.5781552\RMSD=8.383e-09\RMSF=1.795e-06\Dipole=3.136707,0.6947295,11  
.8374991\PG=C01 [X(C22H46B1904)]\@

# 1f [Pyr]

1\1\GINC-MONSTER\FOpt\RHf\6-31G(d)\C21H46B1902(1-)\PIOTR\16-Mar-2009\0  
\\#P HF/6-31G\* FOPT GEOM(NOANGLE,NODISTANCE) FCHECK\\C6-CB9-COO-Ph-C2B  
10-C5, C1 symm\\-1,1\B,-0.1343409572,1.8845616789,-4.7705193445\B,1.68  
5210941,-0.0777090148,4.9761347764\B,0.4281462969,-1.3422942335,5.0052  
326796\B,-1.4488726573,0.6587359447,-4.2721072761\B,0.880711614,1.5139  
875294,5.0114301265\B,-0.220221322,-0.7137658026,-4.405502625\B,-1.158  
7729259,-0.5304977493,5.0783370713\B,1.0946132061,0.5137454342,-4.9069

246045\B,-0.8782364253,1.233647506,5.0847018421\B,0.3735081756,1.25706  
76013,-6.3999600467\B,-1.2444200091,0.3797156203,6.5952807036\B,-1.420  
9314599,1.36635681,-5.9466464812\B,-1.4754449321,-0.4699807845,-5.6966  
420067\B,-0.4415458728,-1.2097229392,6.5414458915\B,0.0137437521,1.639  
9942556,6.552625634\B,0.3225034255,-0.5817116106,-6.1375002916\B,-0.81  
96300001,0.253109668,-7.1011085519\B,1.3127559662,-0.9267393431,6.4851  
7425\B,1.5925948919,0.8334209348,6.4834552834\C,0.0515135927,0.7022012  
567,-3.6976324226\H,2.5105327086,1.275229792,7.0791645047\C,0.44278327  
06,0.9138894081,-2.2899171316\H,2.0511740638,-1.6355942293,7.073823975  
4\O,-0.3012859744,0.1546272955,-1.4509409106\C,-0.1249349892,0.2091272  
484,-0.0993449936\H,-0.1225916738,2.6205456837,7.1949973879\C,1.096612  
845,-0.0232589187,0.506702796\H,-0.8823762738,-2.1183522885,7.14590904  
52\C,1.1832275485,-0.0330711296,1.8863663796\H,-2.2099312534,0.5344028  
312,7.2572527121\C,0.0654048541,0.1807681508,2.6874840662\H,-1.6118105  
498,1.9589085341,4.51776978\C,-1.1522928311,0.4051053751,2.054535103\H  
, -2.0781242946,-0.9888576976,4.503132579\C,-1.2489014374,0.4209988059,  
0.6749829363\H,1.3126212937,2.4130254364,4.3849272492\H,0.0158179365,3  
.0059117508,-4.4171972272\H,0.5606860932,-2.3265501139,4.3714996098\H,  
-2.3578702686,0.7962238699,-3.5218990642\H,2.6769650046,-0.2335745411,  
4.3645638207\H,-0.1151690364,-1.7078823938,-3.7670504183\C,0.277341495  
6,0.134958526,7.3474778714\H,2.2548727017,0.5075057011,-4.66323329\C,0  
.1568605819,0.1665899672,4.2045411037\H,1.0664405703,1.9459800651,-7.0  
845785395\C,0.3724510235,0.1896223663,8.882751629\H,-2.267497054,2.149  
6991099,-6.2527193365\C,-0.2026009676,-1.0027537481,9.6494754271\H,-2.  
3654291447,-1.2592422163,-5.7910480217\C,-0.0466295216,-0.8270967711,1  
1.1619736578\H,0.9756139848,-1.4696320466,-6.5946712518\C,-0.611463301  
8,-2.0022470318,11.9621163452\C,-1.2421257007,0.0527836159,-8.63910783  
77\C,-0.0772583537,-0.151392728,-9.6172871163\C,-0.5216662152,-0.33496  
20864,-11.0713347518\C,0.6401087002,-0.5390039761,-12.0462605362\C,0.1  
963273833,-0.7222064405,-13.4991471882\C,1.3639762954,-0.9253384559,-1  
4.4650437591\H,2.0386795382,-0.0735531483,-14.4477905143\H,1.942295231  
3,-1.8064318517,-14.1998981958\H,1.0177885606,-1.0523486599,-15.487487  
1224\H,-0.4772114764,-1.5746204443,-13.5652927824\H,-0.3815128572,0.14  
56693434,-13.8114117182\H,1.3159979003,0.3128299023,-11.9840739152\H,1  
.2204083628,-1.4076547909,-11.7379512804\H,-1.1970465724,-1.1877616131  
, -11.1363679482\H,-1.1015118815,0.5335795034,-11.3827958368\H,0.598941  
3313,0.6988753001,-9.5573449051\H,0.5042893332,-1.0187314017,-9.311769  
3463\H,-1.9167623518,-0.8006889868,-8.7208102335\H,-1.8235315363,0.915  
2495775,-8.9683860801\C,-0.4550341794,-1.8255250338,13.472093959\H,1.9  
713868974,-0.1827373799,-0.0913907151\H,2.1418560653,-0.2133453079,2.3  
289133382\H,-2.0417819741,0.5701547389,2.6302174179\H,-2.1916804201,0.  
5912141413,0.1899253903\H,0.5910969984,-1.7305519079,13.74958303\H,-0.  
9700052388,-0.9335959016,13.8180395334\H,-0.8644659872,-2.6739086932,1  
4.0119639561\H,-1.6645124954,-2.1287426776,11.7207596651\H,-0.11543198  
64,-2.9195567454,11.652829036\H,1.0070422061,-0.7013213786,11.40594866  
74\H,-0.5434385708,0.0902012721,11.4739274962\H,-1.2543094459,-1.12500  
69499,9.4084338358\H,0.2961594901,-1.9164726886,9.3404609488\H,1.41826  
23081,0.304794114,9.1443943892\H,-0.1273335362,1.0936292409,9.21202759  
87\O,1.2892044996,1.6426662314,-1.8943572893\\Version=x86-Linux-G98Rev  
A.9\HF=-1440.9762002\RMSD=4.737e-09\RMSF=7.502e-07\Dipole=0.2479015,-1  
.175666,10.0318401\PG=C01 [X(C21H46B19O2)]\@

## 2d [Pyr]

1\1\GINC-MONSTER\FOpt\HF\6-31G(d)\C21H46B19N2O2(1-)\PIOTR\10-Mar-2009  
\0\#P HF/6-31G\* FOPT GEOM(NOANGLE,NODISTANCE) FCHECK\C6-CB9-N=N-Ph-O  
CO-C2B10-C5, after optimin\ -1,1\B,0.8062021296,-0.1565037315,5.808191  
1474\B,-0.2186468828,0.9733580995,-5.6190039822\B,-0.9150560512,-0.643  
4785768,-5.9463029643\B,-0.6963181484,-1.2359894678,5.5682599713\B,1.5  
643316836,0.7979037649,-5.5760128927\B,-1.7645074341,0.2731405151,5.49  
95178745\B,0.4392102282,-1.8142152689,-6.1295148285\B,-0.257917378,1.3  
462269089,5.7399039632\B,1.9712405661,-0.9224566476,-5.903205077\B,0.3  
902110793,0.7484543194,7.3325745316\B,1.398350602,-1.3191993699,-7.533  
9648011\B,0.0909963601,-1.0779009647,7.2016134191\B,-1.7262791766,-0.7  
656609638,6.9909952959\B,-0.3781915308,-1.1604211518,-7.55051766\B,2.0

968367166,0.2837973429,-7.1853590872\B,-1.4240150096,1.0619870989,7.10  
40103347\B,-0.8065234673,-0.0571920553,8.244516668\B,-0.7726838909,0.5  
537349217,-7.2478659986\B,0.7541624226,1.4422212444,-7.0135122265\C,-0  
.3624312267,0.0967950449,4.7406015452\H,0.8647533851,2.5363466491,-7.4  
397447877\N,-0.1069499523,0.2173511817,3.3435321371\H,-1.6691629846,1.  
0647792991,-7.8202535635\N,-0.887168336,-0.3704363428,2.6180272608\C,-  
0.6177338943,-0.2330309395,1.2246453654\H,3.09133663,0.6166263455,-7.7  
252046201\C,-1.5198642669,-0.8526564289,0.3762612999\H,-1.0244159258,-  
1.7928235801,-8.3030626867\C,-1.3642021146,-0.7755742878,-0.9989602265  
\H,1.9362030003,-2.042256534,-8.2957557734\C,-0.2925226383,-0.07618736  
21,-1.5033518144\H,2.8648320384,-1.4267813426,-5.3306347551\C,0.622330  
5117,0.5481647058,-0.6768269658\H,0.3245662103,-2.9037276861,-5.703578  
6801\C,0.4601736107,0.468880591,0.6920053574\H,2.1972462724,1.40909477  
8,-4.7923251204\H,1.9135548524,-0.3113532768,5.4087835012\H,-1.9052499  
314,-0.9784407449,-5.4028053842\H,-0.79133685,-2.2619222332,4.98162751  
72\H,-0.7565064709,1.7056909918,-4.8761684063\H,-2.7370603077,0.487327  
557,4.8557973065\C,0.6476160046,0.1135729618,-8.1039673339\H,-0.017988  
5491,2.4160507438,5.2839963161\C,0.5407397412,-0.4739057523,-5.0572588  
19\H,1.2482899607,1.380631034,7.8684097695\C,0.7519674053,0.4621890517  
, -9.6001721045\H,0.6867571218,-2.0142222241,7.641518827\C,-0.091315060  
9,-0.3778993574,-10.5612066994\H,-2.6827723593,-1.4306787893,7.2517027  
318\C,0.1029017809,0.0656739589,-12.0132522358\H,-2.1265326772,1.95942  
34874,7.4596845495\C,-0.7265638462,-0.7529275759,-13.0042750042\C,-1.0  
461728609,-0.1543019631,9.8318081723\C,-0.0468527981,0.6215163246,10.6  
996650838\C,-0.3159392162,0.5012918974,12.20256939\C,0.6810534685,1.27  
50391601,13.0681733566\C,0.4120491977,1.1548785886,14.5697155416\C,1.4  
132244126,1.93122301,15.4256472068\H,2.4272818229,1.5776367255,15.2590  
252617\H,1.3928380606,2.9912538358,15.186840929\H,1.196580582,1.826813  
6935,16.4856419816\H,-0.594638421,1.508425535,14.7847169118\H,0.432287  
5203,0.105097007,14.8563825904\H,1.6900062752,0.9232220373,12.85696836  
23\H,0.6630059137,2.3267233845,12.7852947881\H,-1.3245520421,0.8540247  
478,12.4168424923\H,-0.2969869808,-0.5501472575,12.4884703036\H,0.9625  
333251,0.2727509441,10.4903154373\H,-0.062358869,1.6728543186,10.41878  
71622\H,-2.0522777526,0.1969006346,10.0658234776\H,-1.0267812248,-1.20  
20490681,10.1354287886\C,-0.5316289634,-0.309143262,-14.4536372665\H,-  
2.3440881468,-1.3889778518,0.807536143\H,-2.0633750336,-1.2454418043,-  
1.6656426361\O,-0.1649832359,0.0725495239,-2.8836548478\C,0.5206951459  
, -0.818551164,-3.5779794114\O,1.0578825008,-1.7705238663,-3.1332587403  
\H,1.4443420544,1.0914055734,-1.1055111769\H,1.1543476403,0.9464021932  
,1.3546406001\H,-0.8181103471,0.7302296533,-14.5875340148\H,0.50688050  
89,-0.4066849473,-14.7574493578\H,-1.1320366627,-0.9074805916,-15.1319  
716038\H,-0.4645238813,-1.8044319303,-12.910379545\H,-1.7793458793,-0.  
6762260185,-12.741803284\H,-0.1599260186,1.1178477952,-12.109443439\H,  
1.1561182259,-0.011233074,-12.278287342\H,0.1746010535,-1.4265068669,-  
10.4671858528\H,-1.1418882499,-0.2975922464,-10.2985539544\H,0.4820023  
057,1.5057622065,-9.7150065294\H,1.7950242556,0.3817344641,-9.88438537  
73\\Version=x86-Linux-G98RevA.9\HF=-1549.8095378\RMSD=9.437e-09\RMSF=6  
.433e-07\Dipole=0.6864304,0.5190505,-12.6597065\PG=C01 [X(C21H46B19N2O  
2)]\@

## N-Butyl-4-heptyloxy pyridine (7)

1\1\GINC-MONSTER\Fopt\RFH\6-31G(d)\C16H28N1O1(1+)\PIOTR\10-Apr-2009\0\  
\#P HF/6-31G\* FOPT GEOM(NOANGLE,NODISTANCE) FCHECK\\N-Butyl-4-heptylox  
ypyridinium cation, C1\\1,1\O,-0.4779317225,0.6473135911,-0.6046062704  
\C,-0.5829497383,0.6219629894,0.6869122492\C,0.3891925078,0.1297234366  
,1.5710664884\C,0.1379665964,0.1708898476,2.9128926094\N,-0.996797342,  
0.6646018415,3.4190152364\C,-1.2420655221,0.6441022159,4.8844143598\C,  
-1.9592777963,-0.6269818176,5.3312875634\C,-2.2081563108,-0.6323158001  
,6.842618898\C,-2.9252230211,-1.8990134168,7.3076456886\H,-2.34322938,  
-2.7865543369,7.080376677\H,-3.0874087366,-1.8749461796,8.3787604753\H,  
-3.8934736279,-2.00154498,6.8280315937\H,-1.2596637935,-0.5397600738,  
7.3657417668\H,-2.7982126984,0.2391287317,7.114994767\H,-2.9046057814,

```
-0.7125917022,4.8018389404\H,-1.3637523946,-1.4922356673,5.0519109577\
H,-0.2806138454,0.7461549164,5.3673069632\H,-1.8175980702,1.5280497172
,5.1202487773\C,-1.9413912538,1.1381139687,2.5811934049\C,-1.774766368
9,1.1357685884,1.2357786917\H,-2.5346150037,1.521854196,0.5859652598\H
,-2.8316173837,1.5210455807,3.0391454148\H,0.8545126063,-0.1942259258,
3.6219816942\H,1.3199518538,-0.2730317892,1.2293362856\C,0.6861081661,
0.1573197111,-1.2950316311\C,0.449798274,0.3491524281,-2.779795684\C,1
.6382869452,-0.1438176892,-3.6101161811\C,1.4197163272,0.0411089286,-5
.1135112354\C,2.6009153603,-0.447975251,-5.9533130356\C,2.3857542868,-
0.2645595954,-7.4568509997\C,3.5686600053,-0.7547541218,-8.2906855099\
H,4.4777746472,-0.2175667331,-8.0364139298\H,3.7527591144,-1.812637073
7,-8.1272468315\H,3.385886573,-0.6113279185,-9.3504006384\H,1.48595508
96,-0.7958768691,-7.7588488098\H,2.205435932,0.7869781017,-7.668708398
5\H,3.5019298621,0.0834874628,-5.6520415917\H,2.7819756387,-1.50045816
25,-5.7422346553\H,0.5187196335,-0.4904806205,-5.412432008\H,1.2386744
68,1.0934268774,-5.3222509758\H,2.5383943715,0.3891291211,-3.309894554
7\H,1.8176821959,-1.1964852838,-3.4001443538\H,-0.4521615877,-0.185478
0153,-3.0600354333\H,0.269613374,1.402409822,-2.9696885288\H,1.5469317
582,0.7187681484,-0.9536255922\H,0.8163796123,-0.8882994985,-1.0449638
216\Version=x86-Linux-G98RevA.9\HF=-751.3301961\RMSE=5.659e-09\RMSE=3
.339e-06\Dipole=-1.0113661,0.6234517,4.2700995\PG=C01 [X(C16H28N1O1)]
```

## 6. References

1. B. Ringstrand, A. Balinski, A. Franken, P. Kaszynski *Inorg. Chem.* 2005, **44**, 9561-9566.
2. P. Kaszynski, J. Huang, G. S. Jenkins, K. A. Bairamov, D. Lipiak *Mol. Cryst. Liq. Cryst.* 1995, **260**, 315-331.
3. The original synthesis and the solid-state structure of **11** is reported in Carr, M. Franken, A.; Kaszynski, P.; Kennedy, J. D. *Acta Crystallograph. B*, submitted.
4. Gaussian 98, Revision A.9, M. J. Frisch, G. W. Trucks, H. B. Schlegel, G. E. Scuseria, M. A. Robb, J. R. Cheeseman, V. G. Zakrzewski, J. A. Montgomery, Jr., R. E. Stratmann, J. C. Burant, S. Dapprich, J. M. Millam, A. D. Daniels, K. N. Kudin, M. C. Strain, O. Farkas, J. Tomasi, V. Barone, M. Cossi, R. Cammi, B. Mennucci, C. Pomelli, C. Adamo, S. Clifford, J. Ochterski, G. A. Petersson, P. Y. Ayala, Q. Cui, K. Morokuma, D. K. Malick, A. D. Rabuck, K. Raghavachari, J. B. Foresman, J. Cioslowski, J. V. Ortiz, A. G. Baboul, B. B. Stefanov, G. Liu, A. Liashenko, P. Piskorz, I. Komaromi, R. Gomperts, R. L. Martin, D. J. Fox, T. Keith, M. A. Al-Laham, C. Y. Peng, A. Nanayakkara, M. Challacombe, P. M. W. Gill, B. Johnson, W. Chen, M. W. Wong, J. L. Andres, C. Gonzalez, M. Head-Gordon, E. S. Replogle, and J. A. Pople, Gaussian, Inc., Pittsburgh PA, 1998.
